# Supplementary material for: Predicting asthma attacks using connected mobile devices and machine learning: the AAMOS-00 observational study protocol
Source: PubMed Central journal article supplement — BMJ Open. 2022 Oct 3;12(10):e064166. doi: 10.1136/bmjopen-2022-064166 (PMC9535155; doi:10.1136/bmjopen-2022-064166), 2022-10-03
Supplement: bmjopen-2022-064166.draft_revisions.pdf [file bmjopen-2022-064166.draft_revisions.pdf]

# BMJ Open

BMJ Open is committed to open peer review. As part of this commitment we make the peer review history of every article we publish publicly available.

When an article is published we post the peer reviewers' comments and the authors' responses online. We also post the versions of the paper that were used during peer review. These are the versions that the peer review comments apply to.

The versions of the paper that follow are the versions that were submitted during the peer review process. They are not the versions of record or the final published versions. They should not be cited or distributed as the published version of this manuscript.

BMJ Open is an open access journal and the full, final, typeset and author-corrected version of record of the manuscript is available on our site with no access controls, subscription charges or pay-per-view fees (<http://bmjopen.bmj.com>).

If you have any questions on BMJ Open's open peer review process please email [info.bmjopen@bmj.com](mailto:info.bmjopen@bmj.com)

# BMJ Open

## Predicting asthma attacks using connected mobile devices and machine learning; the AAMOS-00 observational study protocol

|                               |                                                                                                                                                                                                                                                                                                                                           |
|-------------------------------|-------------------------------------------------------------------------------------------------------------------------------------------------------------------------------------------------------------------------------------------------------------------------------------------------------------------------------------------|
| Journal:                      | <i>BMJ Open</i>                                                                                                                                                                                                                                                                                                                           |
| Manuscript ID                 | bmjopen-2022-064166                                                                                                                                                                                                                                                                                                                       |
| Article Type:                 | Protocol                                                                                                                                                                                                                                                                                                                                  |
| Date Submitted by the Author: | 26-Apr-2022                                                                                                                                                                                                                                                                                                                               |
| Complete List of Authors:     | Tsang, Kevin; University of Edinburgh, Usher Institute<br>Pinnock, Hilary; University of Edinburgh, Usher Institute<br>Wilson, Andrew; University of East Anglia, Norwich Medical School<br>Salvi, Dario; Malmo University<br>Shah, Syed Ahmar; The University of Edinburgh Usher Institute of Population Health Sciences and Informatics |
| Keywords:                     | Asthma < THORACIC MEDICINE, Health informatics < BIOTECHNOLOGY & BIOINFORMATICS, Information technology < BIOTECHNOLOGY & BIOINFORMATICS, World Wide Web technology < BIOTECHNOLOGY & BIOINFORMATICS                                                                                                                                      |
|                               |                                                                                                                                                                                                                                                                                                                                           |

SCHOLARONE™  
Manuscripts

# Predicting asthma attacks using connected mobile devices and machine learning; the AAMOS-00 observational study protocol

Kevin C.H. Tsang<sup>1,2</sup>, Hilary Pinnock<sup>1</sup>, Andrew M. Wilson<sup>1,3</sup>, Dario Salvi<sup>4</sup>, Syed Ahmar Shah<sup>1,2</sup>

1. Asthma UK Centre for Applied Research, Usher Institute, University of Edinburgh, Edinburgh, UK

2. Medical Informatics, Usher Institute, University of Edinburgh, Edinburgh, UK

3. Norwich Medical School, University of East Anglia, Norwich, UK

4. Internet of Things and People Research Centre, Malmö University, Malmö, Sweden

Correspondence:

Mr Kevin Cheuk Him Tsang

Usher Institute,

NINE BioQuarter, Little France Road,

Edinburgh, United Kingdom.

EH16 4UX

Email: k.c.h.tsang@sms.ed.ac.uk

Word count: 3155

20

## 21 ABSTRACT

### 22 Introduction:

23 Supported self-management empowering people with asthma to detect early deterioration and take  
24 timely action reduces the risk of asthma attacks. Smartphones and smart monitoring devices  
25 coupled with machine learning could enhance self-management by predicting asthma attacks and  
26 providing tailored feedback.

27 We aim to develop and assess the feasibility of an asthma attack predictor system based on data  
28 collected from a range of smart devices.

### 29 Methods and Analysis:

30 A 2-phase, 7-month observational study to collect data about asthma status using three smart  
31 monitoring devices, and daily symptom questionnaires. We will recruit up to 100 people via social  
32 media and from a severe asthma clinic, who are at risk of attacks and who use a pressurised metered  
33 dose relief inhaler (that fits the smart inhaler device).

34 Following a preliminary month of daily symptom questionnaires, 30 participants able to comply with  
35 regular monitoring will complete six months of using smart devices (smart peak flow meter, smart  
36 inhaler, smartwatch) and daily questionnaires to monitor asthma status. The occurrence of asthma  
37 attacks (definition: ATS/ERS Task Force 2009) will be detected by self-reported use (or increased use)  
38 of oral corticosteroids. Monitoring data will be analysed to identify predictors of asthma attacks. At  
39 the end of the monitoring, we will assess users' perspectives on acceptability and utility of the  
40 system with an exit questionnaire.

### 41 Ethics and Dissemination:

42 Ethics approval was provided by the East of England - Cambridge Central Research Ethics Committee.  
43 IRAS project ID: 285505 with governance approval from ACCORD (Academic and Clinical Central  
44 Office for Research and Development), project number: AC20145. The study sponsor is ACCORD, the  
45 University of Edinburgh.

46 Results will be reported through peer-reviewed publications, abstracts, and conference posters.  
47 Public dissemination will be centred around blogs and social media from the Asthma UK network  
48 and shared with study participants.

### 49 **Key Words**

50 Asthma Attacks, Machine Learning, mHealth, Smart Monitoring Devices, Prediction

51

## 52 ARTICLE SUMMARY

### 53 **Strengths and limitations of this study**

- 54 • This study combines objective data collected from multiple smart monitoring devices  
55 available on the market.

60

1  
2  
3  
4  
5  
6  
7  
8  
9  
10  
11  
12  
13  
14  
15  
16  
17  
18  
19  
20  
21  
22  
23  
24  
25  
26  
27  
28  
29  
30  
31  
32  
33  
34  
35  
36  
37  
38  
39  
40  
41  
42  
43  
44  
45  
46  
47  
48  
49  
50  
51  
52  
53  
54  
55  
56  
57  
58  
59  
60

- Stratified analysis and individualised asthma attack prediction models are not expected, due to the limited number of participants and study period.
- Participants are limited to patients with severe asthma at risk of acute attacks, and to those using a pressurised metered dose relief inhaler that fits our smart device.

For peer review only

61

## 62 INTRODUCTION

63 Asthma is a variable condition, affecting around 5.4 million people in the UK.[1] Every 10 seconds in  
64 the UK alone, someone has an asthma attack. Some of these attacks are life-threatening with over  
65 1400 annual deaths estimated in the UK.[1,2] Since there is no known cure for asthma, self-  
66 management is a key part of patient care; this involves detecting deterioration and taking  
67 appropriate action to maintain control and prevent the threatened attack.[3] The most common  
68 symptoms of asthma are wheezing, cough, chest tightness and shortness of breath.

69 Traditional self-management action plans use symptom scores, sometimes supplemented by peak  
70 flow measurements, to determine a patient's asthma condition.[4–6] Keeping track of relief inhaler  
71 usage can also help measure asthma control.[7] However, patients may regard this level of  
72 monitoring as tedious as it involves high levels of active engagement on their part.

73 Increasingly, smart monitoring devices and “mobile-health” (mHealth) technologies are being  
74 developed to support asthma self-management.[8] Some notable examples include myAsthma [9]  
75 and Asthma MD.[10] myAsthma stores personalised action plans, includes instructional videos about  
76 inhaler techniques, tracks symptoms and peak flow, and provides local weather forecasts.  
77 AsthmaMD [10] has similar features to support self-management and can provide customised  
78 notifications. However, these tools still require a high level to active engagement to monitor one's  
79 asthma.

80 There has been an increasing number of mHealth studies to predict asthma attacks and develop  
81 passive monitoring to support asthma self-management, including the use of smart peak flow  
82 meters,[11] activity tracking,[12,13] smartphone administrated questionnaires,[6,14] and weather  
83 data.[15,16] However, the combined use of the monitoring devices available to asthma patients to  
84 develop asthma attack prediction models is largely unexplored. In addition, whilst there have been  
85 some studies that explored the use of machine learning algorithms for chronic disease management  
86 with home-monitoring data,[17] there is still no mHealth system that is widely used by asthma  
87 patients. One of the key bottlenecks for the limited progress is the difficulty of collecting asthma  
88 monitoring data and the lack of availability of such datasets from existing studies. Apart from the  
89 Asthma Mobile Health Study,[18] no other asthma mHealth dataset is publicly available to be able to  
90 investigate the development and validation of asthma attack prediction algorithm.

91 In this study, we will collect novel asthma monitoring data that will facilitate the development of an  
92 asthma attack prediction algorithm leveraging available, approved asthma monitoring devices in the  
93 market. This study will also enable us to test whether unobtrusive, passive monitoring and machine  
94 learning could help minimise the need for active patient data collection whilst maintaining accuracy  
95 for predicting attacks. We envisage that an mHealth system that leverages machine learning to  
96 predict asthma attacks with passive monitoring will enhance patient adherence and improve patient  
97 self-management.

98 The overarching aim of this study is to develop and assess the feasibility and acceptability of an  
99 asthma self-management system using existing smart devices, collect novel monitoring data and  
100 leverage machine learning to develop asthma attack prediction algorithm.

101

## METHODS AND ANALYSIS

### Study population

To maximise the chances of collecting data related to attacks in a short time-span, we will focus on patients with moderate to severe risk of attacks. Two key predictors are a recent history of attacks and people with severe asthma.[19,20] We will thus focus on adult asthma patients who have had at least one course of oral corticosteroid for an acute asthma attack in the past 12 months, and people attending a secondary care severe asthma clinic. See Table 1 for inclusion and exclusion criteria.

Social media recruitment consists of sending tweets on Twitter and posting on Facebook via the Asthma + Lung UK and Asthma UK Centre for Applied Research (AUKCAR) accounts, which total around 175,000 followers. The Norfolk and Norwich University Hospital will help identify potentially eligible patients for the study and direct them to the online information and expression of interest.

Table 1: Inclusion and exclusion criteria

|                            |                                                                                                                                                                                                                                                                                                                                                                                                                                                                                                                                                                                                                                                                            |
|----------------------------|----------------------------------------------------------------------------------------------------------------------------------------------------------------------------------------------------------------------------------------------------------------------------------------------------------------------------------------------------------------------------------------------------------------------------------------------------------------------------------------------------------------------------------------------------------------------------------------------------------------------------------------------------------------------------|
| <b>Inclusion criteria:</b> | <ul style="list-style-type: none"> <li>• Aged 18 and above</li> <li>• Self-reported or doctor-diagnosed asthma</li> <li>• Possession of a smartphone (from 2016 onwards) that can support the Mobistudy and FindAir mobile apps (Android 4.4+, iOS 10+) and has Bluetooth capabilities</li> <li>• Has had at least one course of oral corticosteroids for an acute asthma attack in the past 12 months</li> <li>• Prescribed with pressurised metered dose relief inhaler that is compatible with FindAir ONE (e.g. Ventolin and other versions of salbutamol if the inhaler is a compatible shape inhaler as Ventolin; Salamol; Airomir; Fostair; Budiair)[21]</li> </ul> |
| <b>Exclusion criteria:</b> | <ul style="list-style-type: none"> <li>• Comorbidities that have overlapping symptoms (e.g. wheezing, cough, chest tightness and shortness of breath)</li> <li>• Aged under 18</li> <li>• Unable to provide valid consent (e.g. cognitive impairment, learning disabilities)</li> <li>• Unable to use an app and respond to questions in English</li> </ul>                                                                                                                                                                                                                                                                                                                |

Potential participants will complete an online questionnaire to identify whether they are eligible to participate. Informed consent will be collected via Online Surveys, a secure online platform for collecting questionnaire data. Potential participants will be given time to read the participant information sheet before deciding whether to participate.

## 121 Sample size calculation

122 To achieve the objectives of this study, we need to collect sufficient data need to train an asthma  
123 attack prediction model.

124 In the study population of UK Optimum Patient Care Research Database (OPCRD) and Clinical  
125 Practice Research Datalink (CPRD), 41% of the patients who had multiple (2 or more) attacks in the  
126 baseline year also had multiple attacks in the following year.[20]

127 Based on 30 participants with daily monitoring, 3,470 recordings (= 30 people × 30 days × (89%  
128 adherence at baseline, 58% adherence at 3 months, 52% adherence at 6 months [22])) for each of  
129 the daily measurements can be expected in phase 2. Also, 12 recorded asthma attacks are expected,  
130 assuming an average of one attack observed per participant in 41% of phase 2 participants during  
131 the study period.[20] To use the novelty detection algorithm iForest (which can be trained even if  
132 the data collected does not include any attacks), a sample of 256 recordings or data points would  
133 suffice.[23] Other machine learning classification algorithms will also obtain high accuracy on this  
134 sample size.

135

## 136 Recruitment strategy

137 Using a similar recruitment method, Hui et al. recruited 87 participants using social media alone, the  
138 majority within the first month after the initial invitational message, although the number of those  
139 who continued to use the app dropped to 15 (17% of the total initially recruited participants) after  
140 30 days.[24] Moreover, only 5% of identified participants through practices agreed to join their study,  
141 which totalled 28 participants from five practices.[24] However, the attrition rate for participants  
142 recruited through practices was lower, 63% vs 83% reduction in social media participants; only 25%  
143 of users were still using the app after 30 days.[24] The eligibility criteria (≥16 years, an asthma  
144 prescription in the previous year, registered with a UK general practitioner) is more relaxed than the  
145 proposed criteria. However, this study incentivises entry of data in the first 28 days by giving  
146 adherent participants access to phase 2 which is likely to result in much more than 25% passing 30  
147 days of participation.

148 Following the previous research, which recruited participants through Asthma UK's social media (at  
149 the time of writing had 175,000 followers), around 87 participants are expected to be eligible and  
150 join this study. In addition, around six participants identified and invited via are expected to be  
151 eligible and join from Norfolk and Norwich University Hospital. Of which, 47 people (50% of 93  
152 respondents) are expected to complete phase 1. Thus, including 30 participants is achievable using  
153 the outlined recruitment method.

154

## 155 Outcomes

### 156 Primary endpoints

157 The primary endpoints of this study are severe asthma attacks, as defined in the American Thoracic  
158 Society (ATS)/European Respiratory Society (ERS) Task Force 2009 statement.[25] The definition is as  
159 follows:



- 1  
2  
3 160 • *Severe asthma attacks* are events that require urgent action on the part of the patient and  
4 161 physician to prevent a serious outcome. Such attacks are defined as a deterioration  
5 162 requiring use of systemic corticosteroids (or an increase from a stable maintenance  
6 163 dose).[25]

7  
8  
9 164 Severe asthma attacks will be identified using the use of systemic corticosteroids question on the  
10 165 weekly self-reported questionnaire. Courses of corticosteroids separated by 1 week or more will be  
11 166 treated as separate severe attacks.

## 13 167 Secondary endpoints

14  
15 168 The secondary endpoints of this study are moderate asthma attacks, as defined in the ATS/ERS Task  
16 169 Force 2009 statement.[25] The definition is as follows:

- 17  
18 170 • A *moderate asthma attack* is an event that, when recognised, should result in a temporary  
19 171 change in treatment to prevent the attack from becoming severe. Such attacks are defined  
20 172 as a deterioration that does not require use of systemic corticosteroids.[25] Moderate  
21 173 asthma attacks include a deterioration in symptoms, lung function, and/or increased rescue  
22 174 bronchodilator use that lasts for 2 days or more but are not severe enough to warrant  
23 175 systemic corticosteroid use.

24  
25  
26 176 Moderate asthma attacks will be identified using the questions about relief inhaler usage, symptoms  
27 177 (day symptoms, nocturnal symptoms, interference with usual activities, shortness of breath,  
28 178 wheezing), and unscheduled care (GP, emergency room, and hospitalisations) in the daily and  
29 179 weekly self-reported questionnaires.

30  
31 180

## 33 181 Data collection

34 182 The data collection period is split into two phases:

- 35  
36  
37 183 1. *Questionnaire monitoring, daily for one month.*  
38  
39 184 2. *Smart device and questionnaire monitoring, daily for six months.* 30 participants who keep a  
40 185 regular diary in phase 1 will be given three smart devices (smart inhaler, smart peak flow  
41 186 meter, smartwatch) to collect data automatically as they use the devices, in addition to  
42 187 completing daily and weekly questionnaires. We will choose participants for this phase with  
43 188 a range of ages, gender, and smoking status, and with different types of asthma triggers.

44  
45  
46 189 At the end of phase 2, we will send a questionnaire asking for feedback about using the smart  
47 190 devices and whether participants think they could be useful to help them look after their asthma.

48  
49 191 We will be using Mobistudy to centralise most of the data collection, only the smart inhaler usage  
50 192 and exit questionnaire will not be collected via Mobistudy (see Figure 1).

51  
52 193

## 54 194 Data collection mobile app (Mobistudy)

55 195 Mobistudy [26] is an open-source platform facilitating mHealth studies available on Android and iOS  
56 196 managed by Malmö University, Sweden. The platform has three key components: a mobile app for  
57 197 participants, a REST API server, and a web portal for researchers (see Figure 2). The platform

198 supports multiple studies and participants of the AAMOS-00 study will be given a study invite code  
199 to join the AAMOS-00 study within Mobistudy.

200 Each daily and weekly assessment, such as questionnaires and peak flow measurement, will appear  
201 as an individual task of the home page on the participant's app (see Figure 3). Once the task is  
202 completed, it will be removed from today's to-do list and the data is sent directly to the server via  
203 the phone Internet connection. In real-time, the research team will be able to view the collected  
204 data via the online web portal for researchers.

205

## 206 Phase 1

207 There will be a total of four questionnaires:

- 208 • A daily questionnaire that asks six questions about daily symptoms experienced, medication  
209 usage, and the triggers encountered. This will take around 2 minutes to complete.
- 210 • A weekly questionnaire that asks 10 questions about asthma symptoms in more detail,  
211 medication usage, and healthcare engagement. This will take around 5 minutes to complete.
- 212 • A questionnaire that asks 11 questions at the start of phase 1 about current asthma  
213 condition and history.
- 214 • A questionnaire that asks five questions about race and smoking status. Additionally, some  
215 demographic information will be collected from the Mobistudy profile of participants, such  
216 as height, weight, and age.

217 The completion rate (50%) of the daily and weekly questionnaire will be used to determine the  
218 eligibility of a participant to join phase 2.

219

## 220 Phase 2

221 In addition to the daily and weekly questionnaires (see Figure 4), in phase 2 participants will be  
222 asked to collect data using three smart monitoring devices: Smart Peak Flow Meter (by Smart  
223 Asthma [27]), FindAir ONE (by FindAir [21]) smart inhaler, and MiBand3 (by Xiaomi [28]) smartwatch.

224 Participants will be given the smart peak flow meter to take a peak expiratory flow measurement  
225 twice a day, once in the morning and once at night; each measurement takes the best of three tries  
226 (see Figure 5). They will also be provided in-app written instructions before each set of  
227 measurements on using the peak flow meter. Furthermore, participants recruited through the  
228 Norfolk and Norwich University Hospital have been trained to use a peak flow meter by the practice.  
229 To connect the smart peak flow meter to the smartphone, participants can either use the audio-jack  
230 connection or a Bluetooth adapter.

231 The FindAir ONE smart inhaler attaches to the top of pressurised metered dose relief inhalers, it  
232 records the time at which the inhaler is used. The device can be moved to a new inhaler if  
233 participants change medication. The device will be connected to participants' smartphone by  
234 Bluetooth to the FindAir mobile app. The data will be transferred from the FindAir server and thence  
235 to the research team using FindAir's Application Programming Interface (API). The data collection  
236 will happen in the background once the participant has set up the connection between their mobile  
237 app and the AAMOS-00 study.

238 Using the MiBand3, we will collect minute-by-minute data on heart rate, step count, activity  
 239 intensity, and activity type. The watch will connect to the participant's smartphone via Bluetooth  
 240 and to the Mobistudy app. Participants will be asked to upload the data from the watch at least once  
 241 every three days. This also gives a chance for users to review their activity (see Figure 6).

242 Local daily weather reports will be obtained using the phone's location combined with the data from  
 243 Open Weather Maps' [29] and Ambee's [30] API. The weather data will include the temperature,  
 244 humidity, clouds, wind, air quality index, and pollen levels of grass, tree, and weeds measured at a  
 245 one-kilometre resolution (see Figure 7).

246

## 247 Exit questionnaire at the end of Phase 2

248 At the end of phase 2, a survey will gather data regarding users' perspective of the acceptability and  
 249 utility of the monitoring system. The survey combines validated questionnaires on usability and  
 250 acceptance (SUS [31] and uMARS [32]) with questions about motivations to use technology (mTEI  
 251 [33]) and desired features in an asthma management system.

252 See Table 2 for a summary of the study's activities.

253

254 Table 2. Summary of data collection

| Assessment                          | Screening | Day 1 baseline | Phase 1        | Day 31 baseline | Phase 2     | Study Exit |
|-------------------------------------|-----------|----------------|----------------|-----------------|-------------|------------|
| Assessment of Eligibility Criteria  | Once      |                |                | Once            |             |            |
| Written informed consent            | Once      |                |                |                 |             |            |
| Demographic data, contact details   |           | Once           |                |                 |             |            |
| Weight/height                       |           | Once           |                |                 |             |            |
| Known triggers                      |           | Once           |                |                 |             |            |
| Peak flow                           |           |                |                |                 | Twice daily |            |
| Heart rate                          |           |                |                |                 | Automated   |            |
| Activity                            |           |                |                |                 | Automated   |            |
| Location, air quality and allergens |           |                |                |                 | Daily       |            |
| Inhaler Usage                       |           |                | Daily & Weekly |                 | Automated   |            |
| Symptoms                            |           |                | Daily & Weekly |                 | Daily       |            |
| Triggers encountered                |           |                | Daily          |                 | Daily       |            |
| Healthcare Usage                    |           |                | Weekly         |                 | Weekly      |            |

|          |  |  |  |  |  |                 |
|----------|--|--|--|--|--|-----------------|
| Feedback |  |  |  |  |  | Once at the end |
|----------|--|--|--|--|--|-----------------|

255

## 256 Data analysis plan

### 257 Feasibility (from usage data)

258 Combining the usage data from phase 1 and 2 of questionnaire completion and device usage will  
 259 compute compliance to the monitoring regime to assess if it is feasible for patients to use the  
 260 monitoring devices in their daily lives.

261 We will also use activity logs on the server, and communication over email with patients, to identify  
 262 major technical issues and shortcomings of the technology.

263

### 264 Acceptability (from survey data)

265 The data from the final questionnaire will be mostly ordinal data, with some free text answers. Free  
 266 text will be processed for thematic text analysis, identifying overall acceptability and recurring topics  
 267 present in the feedback. The ordinal data from answers on a Likert scale will provide measures of  
 268 acceptability.

269

### 270 Prediction of asthma attacks (using monitoring data)

271 Severe asthma attacks will be identified by the reports of oral corticosteroid usage (or an increased  
 272 dose from normal). Moderate and severe asthma attacks will be identified from the daily and weekly  
 273 data, to observe a change in control from the norm lasting two days or more. Sensitivity analysis will  
 274 be conducted using different features to define an asthma attack, such as hospitalisations and  
 275 changes in peak flow.

276 The methods of linear fit and bin-algorithms will be used to collate and produce summary variables  
 277 over irregular time-series and to handle missing data;<sup>[6]</sup> though, the longitudinal data collected in  
 278 this study are likely to be more complete than the Asthma Mobile Health Study.<sup>[34]</sup> Data collected  
 279 from participants who have withdrawn from the study will be used up to the last recording. After  
 280 processing the data, machine learning classifiers will be trained to predict asthma attacks.

281 The primary classifiers that will be used in the study include Bayesian networks, decision trees,  
 282 iForest, logistic regression, and support vector machines.<sup>[35,36]</sup> From the classifiers, a severe  
 283 asthma attack predictor will be built on the device and questionnaire data, at a patient-level and  
 284 population-level. Also, feature selection will be used to identify the most useful features in the  
 285 prediction models.

286 Furthermore, retrospective analysis will simulate the effects of limiting the use of active monitoring  
 287 data, to simulate patients only taking active measurements (e.g., peak flow and symptom diary)  
 288 when prompted. In other words, the training set will be considered as all data before a certain date  
 289 in the study period and the test set everything after. Moreover, there will be simulation of the  
 290 general population using samples of the data, where adherence to monitoring might be lower than  
 291 the selected population. For assessing the performance of the models built in this study, we will use

1  
2  
3 292 k-fold cross validation.[35] The performance metrics will include the common machine learning  
4 293 metrics such as area under the receiver operating characteristic curve (AUC-ROC), sensitivity, and  
5 294 specificity.  
6  
7  
8 295

## 10 296 **PATIENT AND PUBLIC INVOLVEMENT**

11  
12 297 Patient and public involvement (PPI) is part of the project from the beginning. This study is nested  
13 298 within the Asthma UK Centre for Applied Research and has been reviewed by their AUKCAR PPI  
14 299 members.

15  
16 300 All the participant and public-facing documents and study objectives have been reviewed by  
17 301 AUKCAR PPI members before the start of the study and edited accordingly. Such a close PPI  
18 302 involvement ensures that the participant and public facing material is accessible. As an example, we  
19 303 attempted to explain several technical terms (such as “pMDI”) in more detail in the participant  
20 304 documents and added pictures of pressured metered dose inhalers after feedback from PPI  
21 305 members.  
22  
23  
24 306

## 27 307 **DISSEMINATION**

28  
29 308 We will be reporting the results in peer-reviewed journal publications and conference presentations.  
30 309 Dissemination of the results will also include the AUKCAR network with blogs and social media to  
31 310 reach an audience who is interested in the used of smart monitoring devices for asthma.

32  
33 311 We will also be sharing links to publications and summaries with study participants.  
34  
35 312

## 37 313 **ETHICS**

38  
39 314 This study has received ethics approval by the East of England - Cambridge Central Research Ethics  
40 315 Committee. IRAS Project ID: 285505.  
41  
42 316

## 45 317 **DATA AVAILABILITY**

46  
47 318 At the end of the study, the anonymised research data will be stored at Edinburgh DataShare (a  
48 319 digital repository of research data produced at the University of Edinburgh) in perpetuity.  
49  
50 320

## 53 321 **CONCLUSIONS**

54  
55 322 The present study will collect an important and novel dataset, where asthma patients use a  
56 323 combination of multiple market-available mHealth monitoring devices in the real world. We plan to  
57 324 use the rich dataset to improve existing asthma attack prediction algorithms and use the feedback  
58 325 from participants to design a patient-centred asthma self-management system. This study is the first  
59  
60

1  
2  
3 326 step in developing the Asthma Attack Management Online System (AAMOS) which will support  
4 327 asthma patients with real-time tailored feedback based on machine learning driven by mHealth data.

5  
6 328  
7  
8

## 9 329 **ACKNOWLEDGEMENTS**

10  
11 330 We thank the AUKCAR PPI for their comments on the study. We thank Malmö University for their  
12 331 support with data collection. We thank Smart Respiratory Products Ltd for providing the Smart Peak  
13 332 Flow Meter and associated software. We thank FindAir for providing the FindAir ONE devices and  
14 333 FindAir's API. We thank Ambee for providing the pollen data. We thank Dr Sarah Brown (Edinburgh  
15 334 Innovations, University of Edinburgh, UK) for organising the contracts required for the study.

16 335  
17  
18  
19

## 20 336 **AUTHOR CONTRIBUTIONS**

21  
22 337 KCHT, HP, AMW, and SAS designed the study. SAS is the study guarantor. KCHT and DS set up the  
23 338 data collection system. KCHT drafted the manuscript which was critically revised by HP, AMW, DS,  
24 339 and SAS. All authors approved the final version of the manuscript.

25 340  
26  
27  
28

## 29 341 **FUNDING**

30  
31 342 This work was supported by Asthma + Lung UK as part of the Asthma UK Centre for Applied Research  
32 343 grant number AUK-AC-2018-01. Support from Malmö University is co-funded by the Knowledge  
33 344 Foundation KK-stiftelsen.

34 345  
35  
36  
37

## 38 346 **COMPETING INTEREST STATEMENT**

39 347 None declared.

40 348  
41  
42  
43

## 44 349 **REFERENCES**

- 45  
46 350 1 Asthma UK. Asthma facts and statistics. [https://www.asthma.org.uk/about/media/facts-and-](https://www.asthma.org.uk/about/media/facts-and-statistics/)  
47 351 [statistics/](https://www.asthma.org.uk/about/media/facts-and-statistics/) (accessed 1 Mar 2021).
- 48 352 2 Iacobucci G. Asthma deaths rise 33% in past decade in England and Wales. *BMJ*  
49 353 2019;**366**:l5108. doi:10.1136/BMJ.L5108
- 50 354 3 Pinnock H, Parke HL, Panagioti M, *et al.* Systematic meta-review of supported self-  
51 355 management for asthma: A healthcare perspective. *BMC Med* 2017;**15**:64.  
52 356 doi:10.1186/s12916-017-0823-7
- 53 357 4 Scottish Intercollegiate Guidelines Network/ British Thoracic Society. *SIGN 158 British*  
54 358 *guideline on the management of asthma*. London/Edinburgh: : BTS/SIGN 2019.  
55 359 [https://www.brit-thoracic.org.uk/document-library/guidelines/asthma/btssign-guideline-for-](https://www.brit-thoracic.org.uk/document-library/guidelines/asthma/btssign-guideline-for-the-management-of-asthma-2019/)  
56 360 [the-management-of-asthma-2019/](https://www.brit-thoracic.org.uk/document-library/guidelines/asthma/btssign-guideline-for-the-management-of-asthma-2019/)



- 1  
2  
3 361 5 Juniper EF, O'Byrne PM, Guyatt GH, *et al.* Development and validation of a questionnaire to  
4 362 measure asthma control. *Eur Respir J* 1999;**14**:902–7. doi:10.1034/j.1399-3003.1999.14d29.x
- 5  
6 363 6 Tsang KCH, Pinnock H, Wilson AM, *et al.* Application of Machine Learning to Support Self-  
7 364 Management of Asthma with mHealth. In: *2020 42nd Annual International Conference of the*  
8 365 *IEEE Engineering in Medicine & Biology Society (EMBC)*. IEEE 2020. 5673–7.  
9 366 doi:10.1109/EMBC44109.2020.9175679
- 10  
11 367 7 Su JG, Barrett MA, Henderson K, *et al.* Feasibility of Deploying Inhaler Sensors to Identify the  
12 368 Impacts of Environmental Triggers and Built Environment Factors on Asthma Short-Acting  
13 369 Bronchodilator Use. *Environ Health Perspect* 2017;**125**:254–61. doi:10.1289/EHP266
- 14  
15 370 8 Tinschert P, Jakob R, Barata F, *et al.* The Potential of Mobile Apps for Improving Asthma Self-  
16 371 Management: A Review of Publicly Available and Well-Adopted Asthma Apps. *JMIR mHealth*  
17 372 *uHealth* 2017;**5**:e113. doi:10.2196/mhealth.7177
- 18  
19 373 9 MyAsthma. myAsthma: The asthma app for managing your symptoms.  
20 374 <https://mymhealth.com/myasthma> (accessed 10 Mar 2021).
- 21  
22 375 10 AsthmaMD. Asthma Control iPhone App | AsthmaMD. <https://www.asthmamd.org/>  
23 376 (accessed 10 Mar 2021).
- 24  
25 377 11 Finkelstein J, Jeong I cheol. Machine Learning Approaches to Personalize Early Prediction of  
26 378 Asthma Exacerbations. *Ann N Y Acad Sci* 2017;**1387**:153–65. doi:10.1111/nyas.13218
- 27  
28 379 12 Castner J, Jungquist CR, Mammen MJ, *et al.* Prediction Model Development of Women's Daily  
29 380 Asthma Control Using Fitness Tracker Sleep Disruption. *Hear Lung* 2020;**49**:548–55.  
30 381 doi:10.1016/j.hrtlng.2020.01.013
- 31  
32 382 13 Huffaker MF, Carchia M, Harris BU, *et al.* Passive Nocturnal Physiologic Monitoring Enables  
33 383 Early Detection of Exacerbations in Children with Asthma. A Proof-of-Concept Study. *Am J*  
34 384 *Respir Crit Care Med* 2018;**198**:320–8. doi:10.1164/rccm.201712-2606OC
- 35  
36 385 14 Tinschert P, Rassouli F, Barata F, *et al.* Nocturnal Cough and Sleep Quality to Assess Asthma  
37 386 Control and Predict Attacks. *J Asthma Allergy* 2020;**13**:669–78. doi:10.2147/JAA.S278155
- 38  
39 387 15 Khasha R, Sepehri MM, Mahdavian SA. An Ensemble Learning Method for Asthma Control  
40 388 Level Detection with Leveraging Medical Knowledge-Based Classifier and Supervised Learning.  
41 389 *J Med Syst* 2019;**43**:158. doi:10.1007/s10916-019-1259-8
- 42  
43 390 16 Alharbi E, Abdullah M. Asthma Attack Prediction Based on Weather Factors. *Period Eng Nat*  
44 391 *Sci* 2019;**7**:408–19. doi:10.21533/PEN.V7I1.422
- 45  
46 392 17 Exarchos KP, Beltsiou M, Votti CA, *et al.* Artificial intelligence techniques in asthma: a  
47 393 systematic review and critical appraisal of the existing literature. *Eur Respir J* 2020;**56**.  
48 394 doi:10.1183/13993003.00521-2020
- 49  
50 395 18 Chan Y-FY, Wang P, Rogers L, *et al.* The Asthma Mobile Health Study, a large-scale clinical  
51 396 observational study using ResearchKit. *Nat Biotechnol* 2017;**35**:354–62. doi:10.1038/nbt.3826
- 52  
53 397 19 Blakey JD, Price DB, Pizzichini E, *et al.* Identifying Risk of Future Asthma Attacks Using UK  
54 398 Medical Record Data: A Respiratory Effectiveness Group Initiative. *J Allergy Clin Immunol*  
55 399 *Pract* 2017;**5**:1015–1024.e8. doi:10.1016/j.jaip.2016.11.007
- 56  
57 400 20 Price D, Wilson AM, Chisholm A, *et al.* Predicting Frequent Asthma Exacerbations Using Blood  
58 401 Eosinophil Count and Other Patient Data Routinely Available in Clinical Practice. *J Asthma*  
59 402 *Allergy* 2016;**9**:1–12. doi:10.2147/JAA.S97973
- 60

- 1  
2  
3 403 21 FindAir. FindAir. <https://findair.eu/> (accessed 9 Mar 2022).
- 4  
5 404 22 Pathiravasan CH, Zhang Y, Trinquart L, *et al.* Adherence of Mobile App-Based Surveys and  
6 405 Comparison With Traditional Surveys: eCohort Study. *J Med Internet Res* 2021;**23**:e24773.  
7 406 doi:10.2196/24773
- 8  
9 407 23 Liu FT, Ting KM, Zhou Z-H. Isolation Forest. In: *2008 Eighth IEEE International Conference on*  
10 408 *Data Mining*. IEEE 2008. 413–22. doi:10.1109/ICDM.2008.17
- 11  
12 409 24 Hui CY, McKinstry B, Walton R, *et al.* A Mixed Method Observational Study of Strategies to  
13 410 Promote Adoption and Usage of an Application to Support Asthma Self-Management. *J Innov*  
14 411 *Heal Informatics* 2019;**25**:243–53. doi:10.14236/jhi.v25i4.1056
- 15  
16 412 25 Reddel HK, Taylor DR, Bateman ED, *et al.* An official American Thoracic Society/European  
17 413 Respiratory Society statement: Asthma control and exacerbations - Standardizing endpoints  
18 414 for clinical asthma trials and clinical practice. *Am J Respir Crit Care Med* 2009;**180**:59–99.  
19 415 doi:10.1164/rccm.200801-060ST
- 20  
21 416 26 Salvi D, Magnus Olsson C, Ymeri G, *et al.* Mobistudy: mobile-based, platform-independent,  
22 417 multi-dimensional data collection for clinical studies; Mobistudy: mobile-based, platform-  
23 418 independent, multi-dimensional data collection for clinical studies. In: *11th International*  
24 419 *Conference on the Internet of Things*. St.Gallen, Switzerland: : ACM 2021. 219–22.  
25 420 doi:10.1145/3494322
- 26  
27 421 27 Smart Asthma. Smart Asthma. <https://smartasthma.com/> (accessed 9 Mar 2022).
- 28  
29 422 28 Xiaomi. Xiaomi UK. <https://www.mi.com/uk/> (accessed 9 Mar 2022).
- 30  
31 423 29 OpenWeatherMaps. OpenWeatherMap. <https://openweathermap.org/> (accessed 14 Jun  
32 424 2021).
- 33  
34 425 30 Ambee. Ambee. <https://www.getambee.com/> (accessed 14 Jun 2021).
- 35  
36 426 31 Brooke J. SUS: A 'Quick and Dirty' Usability Scale. In: *Usability Evaluation In Industry*. CRC  
37 427 Press 1996. 207–12. doi:10.1201/9781498710411-35
- 38  
39 428 32 Stoyanov SR, Hides L, Kavanagh DJ, *et al.* Development and Validation of the User Version of  
40 429 the Mobile Application Rating Scale (uMARS). *JMIR mHealth uHealth* 2016;**4**:e72.  
41 430 doi:10.2196/mhealth.5849
- 42  
43 431 33 Dewar AR, Bull TP, Malvey DM, *et al.* Developing a Measure of Engagement with Telehealth  
44 432 Systems: The mHealth Technology Engagement Index. *J Telemed Telecare* 2017;**23**:248–55.  
45 433 doi:10.1177/1357633X16640958
- 46  
47 434 34 Chan Y-FY, Bot BM, Zweig M, *et al.* The asthma mobile health study, smartphone data  
48 435 collected using ResearchKit. *Sci Data* 2018;**5**:180096. doi:10.1038/sdata.2018.96
- 49  
50 436 35 Hastie T, Tibshirani R, Friedman J. *The Elements of Statistical Learning*. 2nd ed. New York, NY: :  
51 437 Springer 2009. doi:10.1007/978-0-387-84858-7
- 52  
53 438 36 Bishop CM. *Pattern Recognition and Machine Learning*. Berlin, Heidelberg: : Springer 2006.
- 54 439

## 440 FIGURE LEGENDS

441 *Figure 1. AAMOS-00 system overview*



1  
2  
3  
4  
5  
6  
7  
8  
9  
10  
11  
12  
13  
14  
15  
16  
17  
18  
19  
20  
21  
22  
23  
24  
25  
26  
27  
28  
29  
30  
31  
32  
33  
34  
35  
36  
37  
38  
39  
40  
41  
42  
43  
44  
45  
46  
47  
48  
49  
50  
51  
52  
53  
54  
55  
56  
57  
58  
59  
60

- 442 *Figure 2. Mobistudy system overview*
- 443 *Figure 3. Participant's app home page*
- 444 *Figure 4. Questionnaire delivered by Mobistudy*
- 445 *Figure 5. Smart peak flow meter task*
- 446 *Figure 6. Smartwatch data*
- 447 *Figure 7. Local weather data*
- 448

For peer review only

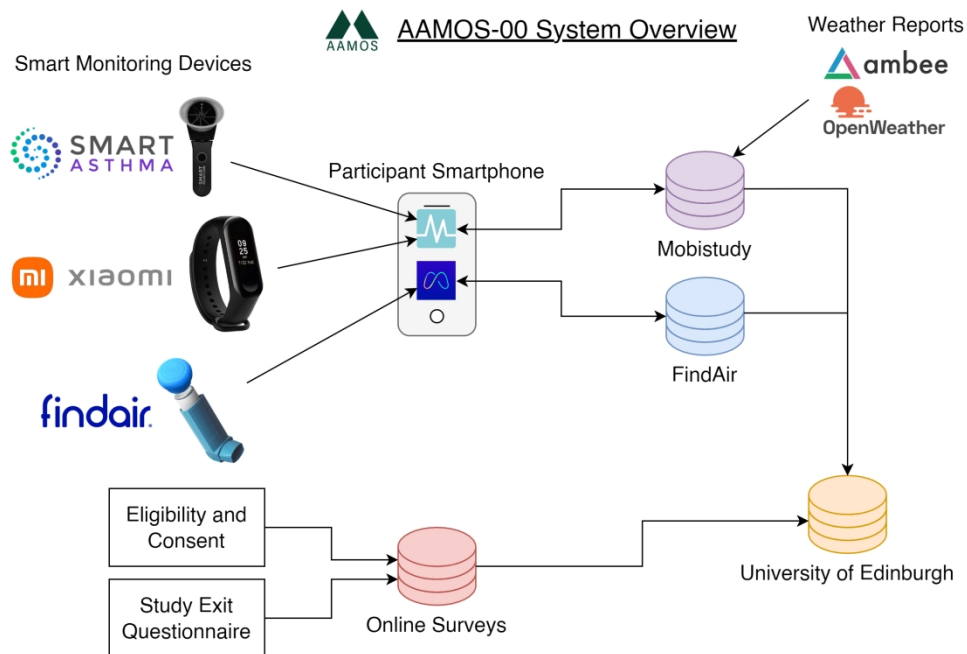

Figure 1: AAMOS-00 system overview

817x542mm (72 x 72 DPI)

1  
2  
3  
4  
5  
6  
7  
8  
9  
10  
11  
12  
13  
14  
15  
16  
17  
18  
19  
20  
21  
22  
23  
24  
25  
26  
27  
28  
29  
30  
31  
32  
33  
34  
35  
36  
37  
38  
39  
40  
41  
42  
43  
44  
45  
46  
47  
48  
49  
50  
51  
52  
53  
54  
55  
56  
57  
58  
59  
60

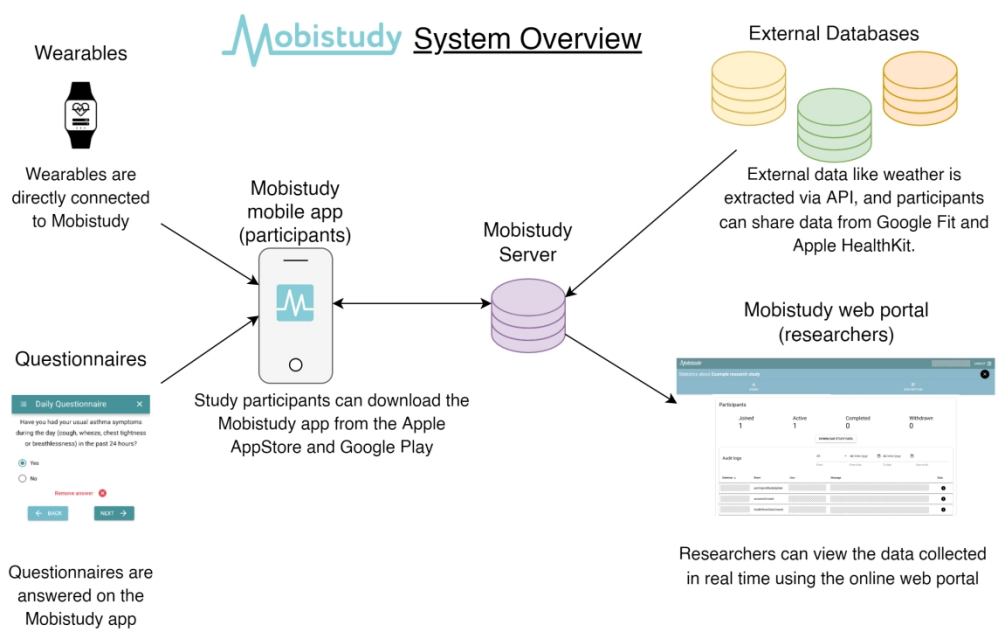

Figure 2: Mobistudy system overview

862x533mm (72 x 72 DPI)

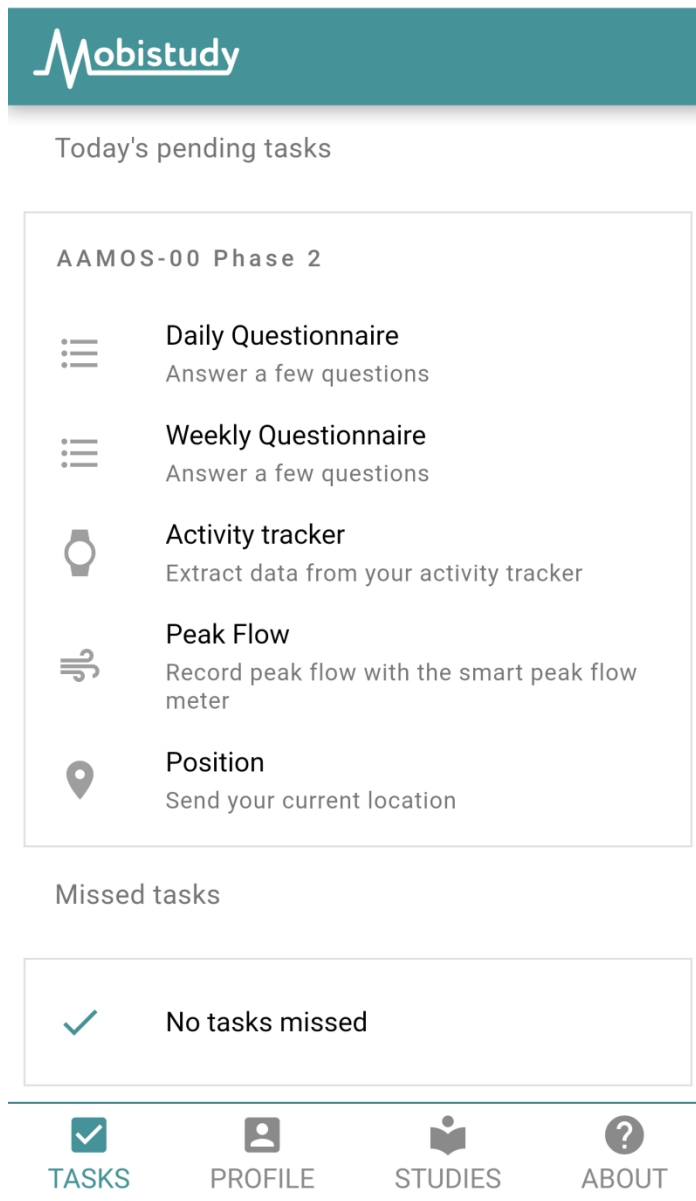

Figure 3: Participant's app home page

962x1649mm (38 x 38 DPI)

1  
2  
3  
4  
5  
6  
7  
8  
9  
10  
11  
12  
13  
14  
15  
16  
17  
18  
19  
20  
21  
22  
23  
24  
25  
26  
27  
28  
29  
30  
31  
32  
33  
34  
35  
36  
37  
38  
39  
40  
41  
42  
43  
44

☰ Daily Questionnaire ✕

Have you had your usual asthma symptoms during the day (cough, wheeze, chest tightness or breathlessness) in the past 24 hours?

Yes

No

Remove answer ✕

← BACK      NEXT →

45  
46  
47  
48  
49  
50  
51  
52  
53  
54  
55  
56  
57  
58  
59  
60

Figure 4: Questionnaire delivered by Mobistudy

962x1647mm (38 x 38 DPI)



1  
2  
3  
4  
5  
6  
7  
8  
9  
10  
11  
12  
13  
14  
15  
16  
17  
18  
19  
20  
21  
22  
23  
24  
25  
26  
27  
28  
29  
30  
31  
32  
33  
34  
35  
36  
37  
38  
39  
40  
41  
42  
43  
44  
45  
46  
47  
48  
49  
50  
51  
52  
53  
54  
55  
56  
57  
58  
59  
60

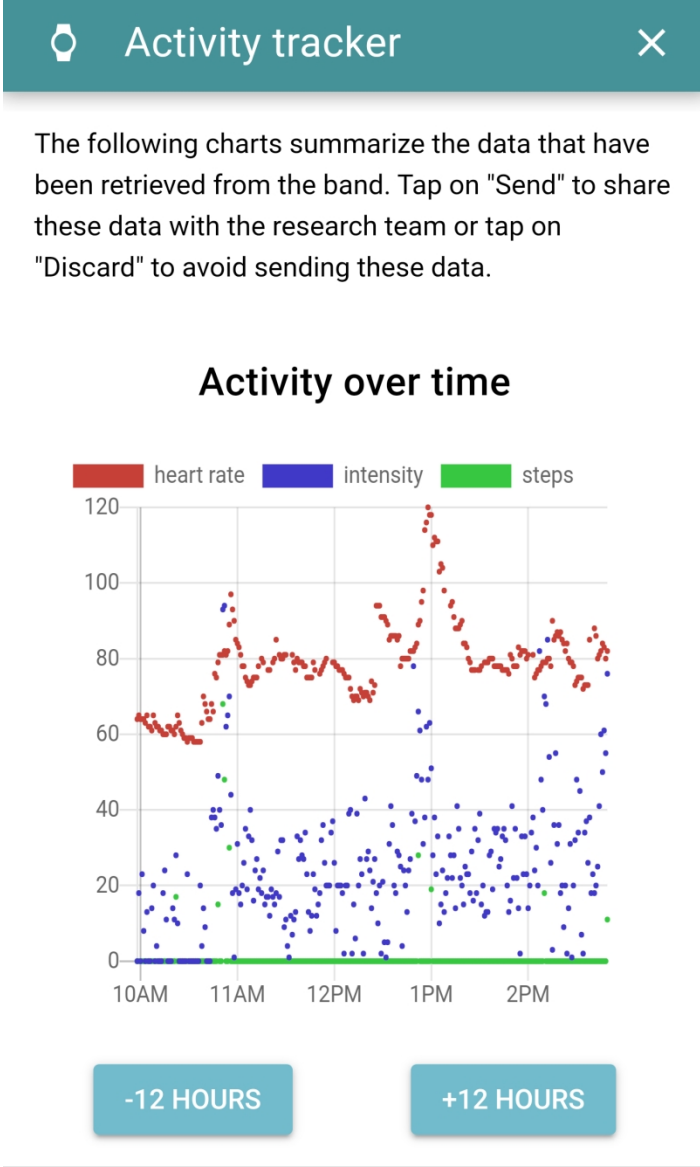

**Time spent in each activity**

Figure 6: Smartwatch data

957x1637mm (38 x 38 DPI)

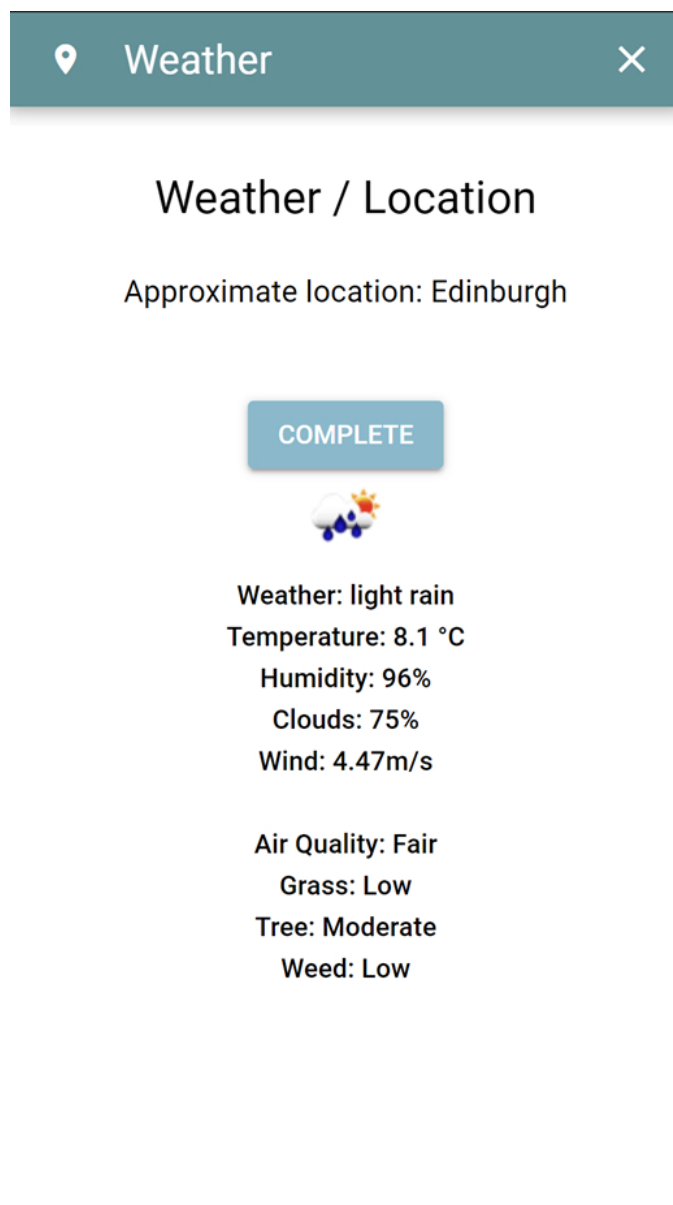

Figure 7: Local weather data

347x616mm (38 x 38 DPI)



## STROBE Statement—checklist of items that should be included in reports of observational studies

|                              | Item No | Recommendation                                                                                                                                                                                                                                                                                                                                                                                                                                                         | Page No |
|------------------------------|---------|------------------------------------------------------------------------------------------------------------------------------------------------------------------------------------------------------------------------------------------------------------------------------------------------------------------------------------------------------------------------------------------------------------------------------------------------------------------------|---------|
| <b>Title and abstract</b>    | 1       | (a) Indicate the study's design with a commonly used term in the title or the abstract                                                                                                                                                                                                                                                                                                                                                                                 | 1       |
|                              |         | (b) Provide in the abstract an informative and balanced summary of what was done and what was found                                                                                                                                                                                                                                                                                                                                                                    | 2       |
| <b>Introduction</b>          |         |                                                                                                                                                                                                                                                                                                                                                                                                                                                                        |         |
| Background/rationale         | 2       | Explain the scientific background and rationale for the investigation being reported                                                                                                                                                                                                                                                                                                                                                                                   | 4       |
| Objectives                   | 3       | State specific objectives, including any prespecified hypotheses                                                                                                                                                                                                                                                                                                                                                                                                       | 4       |
| <b>Methods</b>               |         |                                                                                                                                                                                                                                                                                                                                                                                                                                                                        |         |
| Study design                 | 4       | Present key elements of study design early in the paper                                                                                                                                                                                                                                                                                                                                                                                                                | 7       |
| Setting                      | 5       | Describe the setting, locations, and relevant dates, including periods of recruitment, exposure, follow-up, and data collection                                                                                                                                                                                                                                                                                                                                        | 5       |
| Participants                 | 6       | (a) <i>Cohort study</i> —Give the eligibility criteria, and the sources and methods of selection of participants. Describe methods of follow-up<br><i>Case-control study</i> —Give the eligibility criteria, and the sources and methods of case ascertainment and control selection. Give the rationale for the choice of cases and controls<br><i>Cross-sectional study</i> —Give the eligibility criteria, and the sources and methods of selection of participants | 5       |
|                              |         | (b) <i>Cohort study</i> —For matched studies, give matching criteria and number of exposed and unexposed<br><i>Case-control study</i> —For matched studies, give matching criteria and the number of controls per case                                                                                                                                                                                                                                                 |         |
| Variables                    | 7       | Clearly define all outcomes, exposures, predictors, potential confounders, and effect modifiers. Give diagnostic criteria, if applicable                                                                                                                                                                                                                                                                                                                               | 6       |
| Data sources/<br>measurement | 8*      | For each variable of interest, give sources of data and details of methods of assessment (measurement). Describe comparability of assessment methods if there is more than one group                                                                                                                                                                                                                                                                                   | 7       |
| Bias                         | 9       | Describe any efforts to address potential sources of bias                                                                                                                                                                                                                                                                                                                                                                                                              | NA      |
| Study size                   | 10      | Explain how the study size was arrived at                                                                                                                                                                                                                                                                                                                                                                                                                              | 6       |
| Quantitative variables       | 11      | Explain how quantitative variables were handled in the analyses. If applicable, describe which groupings were chosen and why                                                                                                                                                                                                                                                                                                                                           | 8       |
| Statistical methods          | 12      | (a) Describe all statistical methods, including those used to control for confounding                                                                                                                                                                                                                                                                                                                                                                                  | 10      |
|                              |         | (b) Describe any methods used to examine subgroups and interactions                                                                                                                                                                                                                                                                                                                                                                                                    | 10      |
|                              |         | (c) Explain how missing data were addressed                                                                                                                                                                                                                                                                                                                                                                                                                            | 10      |
|                              | NA      | (d) <i>Cohort study</i> —If applicable, explain how loss to follow-up was addressed<br><i>Case-control study</i> —If applicable, explain how matching of cases and controls was addressed<br><i>Cross-sectional study</i> —If applicable, describe analytical methods taking account of sampling strategy                                                                                                                                                              |         |
|                              |         | (e) Describe any sensitivity analyses                                                                                                                                                                                                                                                                                                                                                                                                                                  | 10      |

Continued on next page

| <b>Results</b>           |     |                                                                                                                                                                                                              |    |
|--------------------------|-----|--------------------------------------------------------------------------------------------------------------------------------------------------------------------------------------------------------------|----|
| Participants             | 13* | (a) Report numbers of individuals at each stage of study—eg numbers potentially eligible, examined for eligibility, confirmed eligible, included in the study, completing follow-up, and analysed            | NA |
|                          |     | (b) Give reasons for non-participation at each stage                                                                                                                                                         | NA |
|                          |     | (c) Consider use of a flow diagram                                                                                                                                                                           | NA |
| Descriptive data         | 14* | (a) Give characteristics of study participants (eg demographic, clinical, social) and information on exposures and potential confounders                                                                     | NA |
|                          |     | (b) Indicate number of participants with missing data for each variable of interest                                                                                                                          | NA |
|                          |     | (c) <i>Cohort study</i> —Summarise follow-up time (eg, average and total amount)                                                                                                                             | NA |
| Outcome data             | 15* | <i>Cohort study</i> —Report numbers of outcome events or summary measures over time                                                                                                                          | NA |
|                          |     | <i>Case-control study</i> —Report numbers in each exposure category, or summary measures of exposure                                                                                                         | NA |
|                          |     | <i>Cross-sectional study</i> —Report numbers of outcome events or summary measures                                                                                                                           | NA |
| Main results             | 16  | (a) Give unadjusted estimates and, if applicable, confounder-adjusted estimates and their precision (eg, 95% confidence interval). Make clear which confounders were adjusted for and why they were included | NA |
|                          |     | (b) Report category boundaries when continuous variables were categorized                                                                                                                                    | NA |
|                          |     | (c) If relevant, consider translating estimates of relative risk into absolute risk for a meaningful time period                                                                                             | NA |
| Other analyses           | 17  | Report other analyses done—eg analyses of subgroups and interactions, and sensitivity analyses                                                                                                               | NA |
| <b>Discussion</b>        |     |                                                                                                                                                                                                              |    |
| Key results              | 18  | Summarise key results with reference to study objectives                                                                                                                                                     | NA |
| Limitations              | 19  | Discuss limitations of the study, taking into account sources of potential bias or imprecision. Discuss both direction and magnitude of any potential bias                                                   | NA |
| Interpretation           | 20  | Give a cautious overall interpretation of results considering objectives, limitations, multiplicity of analyses, results from similar studies, and other relevant evidence                                   | NA |
| Generalisability         | 21  | Discuss the generalisability (external validity) of the study results                                                                                                                                        | 10 |
| <b>Other information</b> |     |                                                                                                                                                                                                              |    |
| Funding                  | 22  | Give the source of funding and the role of the funders for the present study and, if applicable, for the original study on which the present article is based                                                | 12 |

\*Give information separately for cases and controls in case-control studies and, if applicable, for exposed and unexposed groups in cohort and cross-sectional studies.

**Note:** An Explanation and Elaboration article discusses each checklist item and gives methodological background and published examples of transparent reporting. The STROBE checklist is best used in conjunction with this article (freely available on the Web sites of PLoS Medicine at <http://www.plosmedicine.org/>, Annals of Internal Medicine at <http://www.annals.org/>, and Epidemiology at <http://www.epidem.com/>). Information on the STROBE Initiative is available at [www.strobe-statement.org](http://www.strobe-statement.org).

# BMJ Open

## Predicting asthma attacks using connected mobile devices and machine learning; the AAMOS-00 observational study protocol

|                                 |                                                                                                                                                                                                                                                                                                                                                                                                             |
|---------------------------------|-------------------------------------------------------------------------------------------------------------------------------------------------------------------------------------------------------------------------------------------------------------------------------------------------------------------------------------------------------------------------------------------------------------|
| Journal:                        | <i>BMJ Open</i>                                                                                                                                                                                                                                                                                                                                                                                             |
| Manuscript ID                   | bmjopen-2022-064166.R1                                                                                                                                                                                                                                                                                                                                                                                      |
| Article Type:                   | Protocol                                                                                                                                                                                                                                                                                                                                                                                                    |
| Date Submitted by the Author:   | 01-Sep-2022                                                                                                                                                                                                                                                                                                                                                                                                 |
| Complete List of Authors:       | Tsang, Kevin; The University of Edinburgh Usher Institute of Population Health Sciences and Informatics, Usher Institute<br>Pinnock, Hilary; University of Edinburgh, Usher Institute<br>Wilson, Andrew; University of East Anglia, Norwich Medical School<br>Salvi, Dario; Malmö University<br>Shah, Syed Ahmar; The University of Edinburgh Usher Institute of Population Health Sciences and Informatics |
| <b>Primary Subject Heading</b>: | Health informatics                                                                                                                                                                                                                                                                                                                                                                                          |
| Secondary Subject Heading:      | Respiratory medicine, Public health                                                                                                                                                                                                                                                                                                                                                                         |
| Keywords:                       | Asthma < THORACIC MEDICINE, Health informatics < BIOTECHNOLOGY & BIOINFORMATICS, Information technology < BIOTECHNOLOGY & BIOINFORMATICS, World Wide Web technology < BIOTECHNOLOGY & BIOINFORMATICS                                                                                                                                                                                                        |
|                                 |                                                                                                                                                                                                                                                                                                                                                                                                             |

SCHOLARONE™  
Manuscripts

# **Predicting asthma attacks using connected mobile devices and machine learning; the AAMOS-00 observational study protocol**

Kevin C.H. Tsang<sup>1,2</sup>, Hilary Pinnock<sup>1</sup>, Andrew M. Wilson<sup>1,3,4</sup>, Dario Salvi<sup>5</sup>, Syed Ahmar Shah<sup>1,2</sup>

1. Asthma UK Centre for Applied Research, Usher Institute, University of Edinburgh, Edinburgh, UK

2. Medical Informatics, Usher Institute, University of Edinburgh, Edinburgh, UK

3. Norwich Medical School, University of East Anglia, Norwich, UK

4. Norwich University Hospital Foundation Trust, Colney Lane, Norwich, UK

5. Internet of Things and People Research Centre, Malmö University, Malmö, Sweden

Correspondence:

Mr Kevin Cheuk Him Tsang

Usher Institute,

NINE BioQuarter, Little France Road,

Edinburgh, United Kingdom.

EH16 4UX

Email: k.c.h.tsang@sms.ed.ac.uk

Word count: 3544

1  
2  
3 21  
4  
5  
6 22  
7  
8 23  
9  
10 24  
11 25  
12 26  
13 27  
14  
15 28  
16 29  
17  
18 30  
19  
20 31  
21 32  
22 33  
23 34  
24 35  
25 36  
26 37  
27 38  
28 39  
29 40  
30 41  
31 42  
32 43  
33 44  
34 45  
35 46  
36 47  
37 48  
38 49  
39 50  
40 51  
41 52  
42 53  
43 54  
44 55  
45 56  
46 57  
47 58  
48 59  
49 60  
50

## ABSTRACT

### Introduction:

Supported self-management empowering people with asthma to detect early deterioration and take timely action reduces the risk of asthma attacks. Smartphones and smart monitoring devices coupled with machine learning could enhance self-management by predicting asthma attacks and providing tailored feedback.

We aim to develop and assess the feasibility of an asthma attack predictor system based on data collected from a range of smart devices.

### Methods and Analysis:

A 2-phase, 7-month observational study to collect data about asthma status using three smart monitoring devices, and daily symptom questionnaires. We will recruit up to 100 people via social media and from a severe asthma clinic, who are at risk of attacks and who use a pressurised metered dose relief inhaler (that fits the smart inhaler device).

Following a preliminary month of daily symptom questionnaires, 30 participants able to comply with regular monitoring will complete six months of using smart devices (smart peak flow meter, smart inhaler, smartwatch) and daily questionnaires to monitor asthma status. The feasibility of this monitoring will be measured by the percentage of task completion. The occurrence of asthma attacks (definition: ATS/ERS Task Force 2009) will be detected by self-reported use (or increased use) of oral corticosteroids. Monitoring data will be analysed to identify predictors of asthma attacks. At the end of the monitoring, we will assess users' perspectives on acceptability and utility of the system with an exit questionnaire.

### Ethics and Dissemination:

Ethics approval was provided by the East of England - Cambridge Central Research Ethics Committee. IRAS project ID: 285505 with governance approval from ACCORD (Academic and Clinical Central Office for Research and Development), project number: AC20145. The study sponsor is ACCORD, the University of Edinburgh.

Results will be reported through peer-reviewed publications, abstracts, and conference posters. Public dissemination will be centred around blogs and social media from the Asthma UK network and shared with study participants.

### Key Words

Asthma Attacks, Machine Learning, mHealth, Smart Monitoring Devices, Prediction

## ARTICLE SUMMARY

### Strengths and limitations of this study

- This study combines objective data collected from multiple smart monitoring devices available on the market.

1  
2  
3  
4  
5  
6  
7  
8  
9  
10  
11  
12  
13  
14  
15  
16  
17  
18  
19  
20  
21  
22  
23  
24  
25  
26  
27  
28  
29  
30  
31  
32  
33  
34  
35  
36  
37  
38  
39  
40  
41  
42  
43  
44  
45  
46  
47  
48  
49  
50  
51  
52  
53  
54  
55  
56  
57  
58  
59  
60

- 58 • Stratified analysis and individualised asthma attack prediction models are not expected, due  
59 to the limited number of participants and study period.
- 60 • Participants are limited to patients with severe asthma at risk of acute attacks, and to those  
61 using a pressurised metered dose relief inhaler that fits our smart device.

For peer review only

63

## 64 INTRODUCTION

65 Asthma is a variable condition, affecting around 5.4 million people in the UK.[1] Every 10 seconds in  
66 the UK alone, someone has an asthma attack. Some of these attacks are life-threatening with over  
67 1400 annual deaths estimated in the UK.[1,2] Since there is no known cure for asthma, self-  
68 management is a key part of patient care; this involves detecting deterioration and taking  
69 appropriate action to maintain control and prevent the threatened attack.[3] The most common  
70 symptoms of asthma are wheezing, cough, chest tightness and shortness of breath.

71 Traditional self-management action plans use symptom scores, sometimes supplemented by peak  
72 flow measurements, to determine a patient's asthma condition.[4–6] Keeping track of relief inhaler  
73 usage can also help measure asthma control.[7] However, patients may regard this level of  
74 monitoring as tedious as it involves high levels of active engagement on their part.

75 Increasingly, smart monitoring devices and “mobile-health” (mHealth) technologies are being  
76 developed to support asthma self-management.[8] Some notable examples include myAsthma [9]  
77 and Asthma MD.[10] myAsthma stores personalised action plans, includes instructional videos about  
78 inhaler techniques, tracks symptoms and peak flow, and provides local weather forecasts.  
79 AsthmaMD [10] has similar features to support self-management and can provide customised  
80 notifications. However, these tools still require a high level to active engagement to monitor one's  
81 asthma.

82 There has been an increasing number of mHealth studies to predict asthma attacks and develop  
83 passive monitoring to support asthma self-management,[11] including the use of smart peak flow  
84 meters,[12] night-time activity tracking,[13,14] smart inhalers,[15] smartphone administrated  
85 questionnaires,[6,16,17] and weather data.[18,19] However, the combined use of the monitoring  
86 devices available to asthma patients to develop asthma attack prediction models is largely  
87 unexplored. In addition, whilst there have been some studies that explored the use of machine  
88 learning algorithms for chronic disease management with home-monitoring data,[20] there is still no  
89 mHealth system that is widely used by asthma patients. One of the key bottlenecks for the limited  
90 progress is the difficulty of collecting asthma monitoring data and the lack of availability of such  
91 datasets from existing studies. Apart from the Asthma Mobile Health Study,[21] no other asthma  
92 mHealth dataset is publicly available to be able to investigate the development and validation of  
93 asthma attack prediction algorithm.

94 A related study is the myAirCoach study,[22] which investigated asthma home-monitoring using  
95 connected devices. However, their participants conducted daily monitoring for the first month with  
96 an additional randomly allocated two weeks, compared to seven months in total proposed in this  
97 study. To our knowledge, the dataset from myAirCoach is not publicly available and it has not yet  
98 been used to test any machine learning-based algorithms for asthma attack prediction.[23,24]

99 In this study, we will collect novel asthma monitoring data that will facilitate the development of an  
100 asthma attack prediction algorithm leveraging available, approved asthma monitoring devices in the  
101 market. This study will also enable us to test whether unobtrusive, passive monitoring and machine  
102 learning could help minimise the need for active patient data collection whilst maintaining accuracy  
103 for predicting attacks. We envisage that an mHealth system that leverages machine learning to  
104 predict asthma attacks with passive monitoring will enhance patient adherence and improve patient  
105 self-management.

1  
2  
3 106 The overarching aim of this study is to develop and assess the feasibility and acceptability of an  
4 107 asthma self-management system using existing smart devices, collect novel monitoring data and  
5 108 leverage machine learning to explore the feasibility of an asthma attack prediction algorithm based  
6 109 on passive monitoring.  
7  
8  
9 110

## 11 111 METHODS AND ANALYSIS

### 12 112 Study population

13  
14 112  
15 113 To maximise the chances of collecting data related to attacks in a short time-span, we will focus on  
16 114 patients with moderate to severe risk of attacks. Two key predictors are a recent history of attacks  
17 115 and people with severe asthma.[25,26] We will thus focus on adult asthma patients who have had at  
18 116 least one course of oral corticosteroid for an acute asthma attack in the past 12 months, and people  
19 117 attending a secondary care severe asthma clinic. See Table 1 for inclusion and exclusion criteria.

20  
21  
22 118 Social media recruitment consists of sending tweets on Twitter and posting on Facebook via the  
23 119 Asthma + Lung UK and Asthma UK Centre for Applied Research (AUKCAR) accounts, which total  
24 120 around 175,000 followers. The Norfolk and Norwich University Hospital will help identify potentially  
25 121 eligible patients for the study and direct them to the online information and expression of interest.  
26  
27  
28 122

29 123 Table 1: Inclusion and exclusion criteria

|                                                                                                                                                                           |                                                                                                                                                                                                                                                                                                                                                                                                                                                                                                                                                                                                                                                                            |
|---------------------------------------------------------------------------------------------------------------------------------------------------------------------------|----------------------------------------------------------------------------------------------------------------------------------------------------------------------------------------------------------------------------------------------------------------------------------------------------------------------------------------------------------------------------------------------------------------------------------------------------------------------------------------------------------------------------------------------------------------------------------------------------------------------------------------------------------------------------|
| <p>31<br/>32<br/>33<br/>34<br/>35<br/>36<br/>37<br/>38<br/>39<br/>40<br/>41<br/>42<br/>43<br/>44<br/>45<br/>46<br/>47<br/>48<br/>49</p> <p><b>Inclusion criteria:</b></p> | <ul style="list-style-type: none"> <li>• Aged 18 and above</li> <li>• Self-reported or doctor-diagnosed asthma</li> <li>• Possession of a smartphone (from 2016 onwards) that can support the Mobistudy and FindAir mobile apps (Android 4.4+, iOS 10+) and has Bluetooth capabilities</li> <li>• Has had at least one course of oral corticosteroids for an acute asthma attack in the past 12 months</li> <li>• Prescribed with pressurised metered dose relief inhaler that is compatible with FindAir ONE (e.g. Ventolin and other versions of salbutamol if the inhaler is a compatible shape inhaler as Ventolin; Salamol; Airomir; Fostair; Budiair)[27]</li> </ul> |
| <p>50<br/>51<br/>52<br/>53<br/>54<br/>55<br/>56<br/>57<br/>58<br/>59</p> <p><b>Exclusion criteria:</b></p>                                                                | <ul style="list-style-type: none"> <li>• Comorbidities that have overlapping symptoms (e.g. wheezing, cough, chest tightness and shortness of breath)</li> <li>• Aged under 18</li> <li>• Unable to provide valid consent (e.g. cognitive impairment, learning disabilities)</li> <li>• Unable to use an app and respond to questions in English</li> </ul>                                                                                                                                                                                                                                                                                                                |

60 124



1  
2  
3 125 Potential participants will complete an online questionnaire to identify whether they are eligible to  
4 126 participate. Informed consent will be collected via Online Surveys, a secure online platform for  
5 127 collecting questionnaire data. Potential participants will be given time to read the participant  
6 128 information sheet before deciding whether to participate.

7  
8  
9 129

## 10 130 Sample size calculation

11  
12  
13 131 To achieve the objectives of this study, we need to collect sufficient data need to train an asthma  
14 132 attack prediction model.

15  
16 133 In the study population of UK Optimum Patient Care Research Database (OPCRD) and Clinical  
17 134 Practice Research Datalink (CPRD), 41% of the patients who had multiple (2 or more) attacks in the  
18 135 baseline year also had multiple attacks in the following year.[26]

19  
20 136 Based on 30 participants with daily monitoring, 3,098 recordings (= 30 people × 30 days × (85%  
21 137 retention at baseline,[28–30] 50% retention at 6 months[28,29,31,32]) × 85% adherence[30,31]) for  
22 138 each of the daily measurements can be expected in phase 2. Also, 12 recorded asthma attacks are  
23 139 expected, assuming an average of one attack observed per participant in 41% of phase 2 participants  
24 140 during the study period.[26] To use the novelty detection algorithm iForest (which can be trained  
25 141 even if the data collected does not include any attacks), a sample of 256 recordings or data points  
26 142 would suffice.[33] Other machine learning classification algorithms will also obtain high accuracy on  
27 143 this sample size.

28  
29 144

## 30 145 Recruitment strategy

31  
32  
33 146 Using a similar recruitment method, Hui et al. recruited 87 participants using social media alone, the  
34 147 majority within the first month after the initial invitational message, although the number of those  
35 148 who continued to use the app dropped to 15 (17% of the total initially recruited participants) after  
36 149 30 days.[28] Moreover, only 5% of identified participants through practices agreed to join their study,  
37 150 which totalled 28 participants from five practices.[28] However, the attrition rate for participants  
38 151 recruited through practices was lower, 63% vs 83% reduction in social media participants; only 25%  
39 152 of users were still using the app after 30 days.[28] The eligibility criteria (≥16 years, an asthma  
40 153 prescription in the previous year, registered with a UK general practitioner) is more relaxed than the  
41 154 proposed criteria. However, this study incentivises entry of data in the first 28 days by giving  
42 155 adherent participants access to phase 2 (where participants are sent smart devices) which is likely to  
43 156 result in much more than 25% passing 30 days of participation. The adherence to four weeks of  
44 157 monitoring with daily questionnaires and activity monitors has seen values upwards of 95%.[30]

45  
46 158 Following the previous research, which recruited participants through Asthma UK's social media (at  
47 159 the time of writing had 175,000 followers), around 87 participants are expected to be eligible and  
48 160 join this study. In addition, around six participants identified and invited via are expected to be  
49 161 eligible and join from Norfolk and Norwich University Hospital. Of which, 47 people (50% of 93  
50 162 respondents) are expected to complete phase 1. Thus, including 30 participants is achievable using  
51 163 the outlined recruitment method.

52  
53 164

## 165 Outcomes

### 166 Primary endpoints

167 The primary endpoints of this study are adherence to monitoring, which are defined by the  
168 collection of data using different devices. For each task, we will measure the percentage of total  
169 days completed.

### 170 Secondary endpoints

171 The secondary endpoints of this study are asthma attacks. Primarily, we use severe asthma attacks  
172 as defined in the American Thoracic Society (ATS)/European Respiratory Society (ERS) Task Force  
173 2009 statement.[34] The definition is as follows:

- 174 • *Severe asthma attacks* are events that require urgent action on the part of the patient and  
175 physician to prevent a serious outcome. Such attacks are defined as a deterioration  
176 requiring use of systemic corticosteroids (or an increase from a stable maintenance  
177 dose).[34]

178 Severe asthma attacks will be identified using the use of systemic corticosteroids question on the  
179 weekly self-reported questionnaire. Courses of corticosteroids separated by 1 week or more will be  
180 treated as separate severe attacks.

181 We will also explore the use of moderate asthma attacks, as defined in the ATS/ERS Task Force 2009  
182 statement.[34] The definition is as follows:

- 183 • A *moderate asthma attack* is an event that, when recognised, should result in a temporary  
184 change in treatment to prevent the attack from becoming severe. Such attacks are defined  
185 as a deterioration that does not require use of systemic corticosteroids.[34] Moderate  
186 asthma attacks include a deterioration in symptoms, lung function, and/or increased rescue  
187 bronchodilator use that lasts for 2 days or more but are not severe enough to warrant  
188 systemic corticosteroid use.

189 Moderate asthma attacks will be identified using the questions about relief inhaler usage, symptoms  
190 (day symptoms, nocturnal symptoms, interference with usual activities, shortness of breath,  
191 wheezing), and unscheduled care (GP, emergency room, and hospitalisations) in the daily and  
192 weekly self-reported questionnaires.

193

### 194 Data collection

195 The data collection period is split into two phases:

- 196 1. *Questionnaire monitoring, daily for one month.*
- 197 2. *Smart device and questionnaire monitoring, daily for six months.* 30 participants who keep a  
198 regular diary in phase 1 will be given three smart devices (smart inhaler, smart peak flow  
199 meter, smartwatch) to collect data automatically as they use the devices, in addition to  
200 completing daily and weekly questionnaires. We will choose participants for this phase with  
201 a range of ages, gender, and smoking status, and with different types of asthma triggers.

202 At the end of phase 2, we will send a questionnaire asking for feedback about using the smart  
203 devices and whether participants think they could be useful to help them look after their asthma.

204 We will be using Mobistudy to centralise most of the data collection, only the smart inhaler usage  
205 and exit questionnaire will not be collected via Mobistudy (see Figure 1).

206

### 207 Data collection mobile app (Mobistudy)

208 Mobistudy [35] is an open-source platform facilitating mHealth studies available on Android and iOS  
209 managed by Malmö University, Sweden. The platform has three key components: a mobile app for  
210 participants, a REST API server, and a web portal for researchers (see Figure 2). The platform  
211 supports multiple studies and participants of the AAMOS-00 study will be given a study invite code  
212 to join the AAMOS-00 study within Mobistudy.

213 Each daily and weekly assessment, such as questionnaires and peak flow measurement, will appear  
214 as an individual task of the home page on the participant's app (see Figure 3). Once the task is  
215 completed, it will be removed from today's to-do list and the data is sent directly to the server via  
216 the phone Internet connection. In real-time, the research team will be able to view the collected  
217 data via the online web portal for researchers.

218

### 219 Phase 1

220 There will be a total of four questionnaires:

- 221 • A daily questionnaire that asks six questions about daily symptoms experienced, medication  
222 usage, and the triggers encountered. This will take around 2 minutes to complete.
- 223 • A weekly questionnaire that asks 10 questions about asthma symptoms in more detail,  
224 medication usage, and healthcare engagement. This will take around 5 minutes to complete.
- 225 • A questionnaire that asks 11 questions at the start of phase 1 about current asthma  
226 condition and history.
- 227 • A questionnaire that asks five questions about race and smoking status. Additionally, some  
228 demographic information will be collected from the Mobistudy profile of participants, such  
229 as height, weight, and age.

230 The completion rate (50%) of the daily and weekly questionnaire will be used to determine the  
231 eligibility of a participant to join phase 2.

232

### 233 Phase 2

234 In addition to the daily and weekly questionnaires (see Figure 4), in phase 2 participants will be  
235 asked to collect data using three smart monitoring devices: Smart Peak Flow Meter (by Smart  
236 Asthma [36]), FindAir ONE (by FindAir [27]) smart inhaler, and MiBand3 (by Xiaomi [37]) smartwatch.

237 Participants will be given the smart peak flow meter to take a peak expiratory flow measurement  
238 twice a day, once in the morning and once at night; each measurement takes the best of three tries  
239 (see Figure 5). They will also be provided in-app written instructions before each set of  
240 measurements on using the peak flow meter. Furthermore, participants recruited through the  
241 Norfolk and Norwich University Hospital have been trained to use a peak flow meter by the practice.

242 To connect the smart peak flow meter to the smartphone, participants can either use the audio-jack  
243 connection or a Bluetooth adapter.

244 The FindAir ONE smart inhaler attaches to the top of pressurised metered dose relief inhalers, it  
245 records the time at which the inhaler is used. The device can be moved to a new inhaler if  
246 participants change medication. The device will be connected to participants' smartphone by  
247 Bluetooth to the FindAir mobile app. The data will be transferred from the FindAir server and thence  
248 to the research team using FindAir's Application Programming Interface (API). The data collection  
249 will happen in the background once the participant has set up the connection between their mobile  
250 app and the AAMOS-00 study.

251 Using the MiBand3, we will collect minute-by-minute data on heart rate, step count, activity  
252 intensity, and activity type. The watch will connect to the participant's smartphone via Bluetooth  
253 and to the Mobistudy app. Participants will be asked to upload the data from the watch at least once  
254 every three days. This also gives a chance for users to review their activity (see Figure 6).

255 Local daily weather reports will be obtained using the phone's location combined with the data from  
256 Open Weather Maps' [38] and Ambee's [39] API. The weather data will include the temperature,  
257 humidity, clouds, wind, air quality index, and pollen levels of grass, tree, and weeds measured at a  
258 one-kilometre resolution (see Figure 7).

259

## 260 Exit questionnaire at the end of Phase 2

261 At the end of phase 2, a survey will gather data regarding users' perspective of the acceptability and  
262 utility of the monitoring system. The survey combines validated questionnaires on usability and  
263 acceptance (SUS [40] and uMARS [41]) with questions about motivations to use technology (mTEI  
264 [42]) and desired features in an asthma management system.

265 See Table 2 for a summary of the study's activities.

266

267 Table 2. Summary of data collection

| Assessment                          | Screening | Day 1 baseline | Phase 1        | Day 31 baseline | Phase 2     | Study Exit      |
|-------------------------------------|-----------|----------------|----------------|-----------------|-------------|-----------------|
| Assessment of Eligibility Criteria  | Once      |                |                | Once            |             |                 |
| Written informed consent            | Once      |                |                |                 |             |                 |
| Demographic data, contact details   |           | Once           |                |                 |             |                 |
| Weight/height                       |           | Once           |                |                 |             |                 |
| Known triggers                      |           | Once           |                |                 |             |                 |
| Peak flow                           |           |                |                |                 | Twice daily |                 |
| Heart rate                          |           |                |                |                 | Automated   |                 |
| Activity                            |           |                |                |                 | Automated   |                 |
| Location, air quality and allergens |           |                |                |                 | Daily       |                 |
| Inhaler Usage                       |           |                | Daily & Weekly |                 | Automated   |                 |
| Symptoms                            |           |                | Daily & Weekly |                 | Daily       |                 |
| Triggers encountered                |           |                | Daily          |                 | Daily       |                 |
| Healthcare Usage                    |           |                | Weekly         |                 | Weekly      |                 |
| Feedback                            |           |                |                |                 |             | Once at the end |

268

269 At the end of the study, participants will be compensated for mobile data charges that may have  
 270 incurred from participating in the study, £5 per month. Participants are also able to continue using  
 271 the smart devices beyond the study.

272 Following ethics approval in December 2020, we aim to complete the study by June 2023.

273

## 274 Data analysis plan

### 275 Feasibility (from usage data)

276 Combining the usage data from phase 1 and 2 of questionnaire completion and device usage will  
 277 compute compliance to the monitoring regime to assess if it is feasible for patients to use the  
 278 monitoring devices in their daily lives.

279 We will also use activity logs on the server, and communication over email with patients, to identify  
 280 major technical issues and shortcomings of the technology.

281

## 282 Acceptability (from survey data)

283 The data from the final questionnaire will be mostly ordinal data, with some free text answers. Free  
284 text will be processed for thematic text analysis, identifying overall acceptability and recurring topics  
285 present in the feedback. The ordinal data from answers on a Likert scale will provide measures of  
286 acceptability.

287

## 288 Exploring asthma attack prediction (using monitoring data)

289 Severe asthma attacks will be identified by the reports of oral corticosteroid usage (or an increased  
290 dose from normal). Moderate and severe asthma attacks will be identified from the daily and weekly  
291 data, to observe a change in control from the norm lasting two days or more. Sensitivity analysis will  
292 be conducted using different features to define an asthma attack, such as hospitalisations and  
293 changes in peak flow. Data collected from participants who have withdrawn from the study will be  
294 used up to the last recording.

295 The methods of linear fit and bin-algorithms will be used to collate and produce summary variables  
296 over irregular time-series and to handle missing data.[6] After processing the data, machine learning  
297 classifiers will be trained to predict asthma attacks. Evaluation of these classifiers will allow  
298 comparison with the benchmarks set using daily questionnaires alone.[6] However, due to the  
299 selection of participants with higher adherence to monitoring in phase 2 of this AAMOS-00 study,  
300 the longitudinal data collected in this study are likely to be more complete than the data collected by  
301 the wide range of participants in the Asthma Mobile Health Study.[43]

302 Using different subsets of the data and features, we will test the performance of predictions made  
303 using different modes of monitoring, such as self-reported data alone, self-reported and objective  
304 data (active and passive monitoring), and passive monitoring data only (see Figure 8). Our previous  
305 analysis using only self-reported data achieved  $AUC > 0.87$  and we expect the performance to  
306 increase with the addition of objective data.[6]

307 There is no consensus on the optimal algorithm for classification as previous studies are not  
308 comparable.[11] Therefore, we have taken a broad approach to use five state-of-the-art algorithm  
309 classes including Bayesian networks, decision trees, iForest, logistic regression, and support vector  
310 machines.[44,45] From the classifiers, a severe asthma attack predictor will be built on the device  
311 and questionnaire data, at a patient-level and population-level. Also, feature selection will be used  
312 to identify the most useful features in the prediction models.

313 Furthermore, if there are sufficient data, retrospective analysis will simulate the effects of limiting  
314 the use of active monitoring data, to simulate patients only taking active measurements (e.g., peak  
315 flow and symptom diary) when prompted. Moreover, there will be simulation of the general  
316 population using samples of the data, where adherence to monitoring is lower than the select  
317 population. For assessing the performance of the models built in this study, we will use k-fold cross  
318 validation.[44] The performance metrics will include the common machine learning metrics such as  
319 area under the receiver operating characteristic curve (AUC-ROC), sensitivity, and specificity.

320

## 321 **Strengths and limitations**

322 This study combines objective data collected from multiple smart monitoring devices available on  
323 the market. Not only will this independently test the monitoring devices in the real-world, but also  
324 patients will be able to continue using the devices they have found useful beyond the study. It also  
325 allows other researchers to reproduce the study with the current or latest versions of the devices.

326 Due to the limited number of participants and study period, stratified analysis and individualised  
327 asthma attack prediction models are not expected. However, seven months of daily monitoring per  
328 participant will provide insightful data.

329 This study is limited to patients with severe asthma at risk of acute attacks, and the findings may not  
330 generalise to the wider asthma population. Furthermore, only participants using a pressurised  
331 metered dose relief inhaler that fits our smart device are able to join the study, which is around 80%  
332 of the UK's asthma population.[46] If there are sufficient data, we will explore the generalisability of  
333 the results through simulating different adherence to monitoring.

334 The anonymised research data will be stored at Edinburgh DataShare (a digital repository of research  
335 data produced at the University of Edinburgh),[47] which researchers can access for their own  
336 research.

337

## 338 **PATIENT AND PUBLIC INVOLVEMENT**

339 Patient and public involvement (PPI) is part of the project from the beginning. This study is nested  
340 within the Asthma UK Centre for Applied Research and has been reviewed by their AUKCAR PPI  
341 members.

342 All the participant and public-facing documents and study objectives have been reviewed by  
343 AUKCAR PPI members before the start of the study and edited accordingly. Such a close PPI  
344 involvement ensures that the participant and public facing material is accessible. As an example, we  
345 attempted to explain several technical terms (such as "pMDI") in more detail in the participant  
346 documents and added pictures of pressured metered dose inhalers after feedback from PPI  
347 members.

348 The findings about feasibility and acceptability will be interpreted with input from PPI members.  
349 Furthermore, we plan to continue working with PPI members to develop a system that supports  
350 asthma self-management.

351

## 352 **DISSEMINATION**

353 We will be reporting the results in peer-reviewed journal publications and conference presentations.  
354 Dissemination of the results will also include the AUKCAR network with blogs and social media to  
355 reach an audience who is interested in the used of smart monitoring devices for asthma.

356 We will also be sharing links to publications and summaries with study participants.

357



## 358 ETHICS

359 This study has received ethics approval by the East of England - Cambridge Central Research Ethics  
360 Committee. IRAS Project ID: 285505.

361

## 362 DATA AVAILABILITY

363 At the end of the study, the anonymised research data will be stored at Edinburgh DataShare (a  
364 digital repository of research data produced at the University of Edinburgh) in perpetuity.  
365 Researchers will be able to access and download the data from the website for their own research.

366

## 367 CONCLUSIONS

368 The present study will collect an important and novel dataset, where asthma patients use a  
369 combination of multiple market-available mHealth monitoring devices in the real world. We plan to  
370 use the rich dataset to improve existing asthma attack prediction algorithms and use the feedback  
371 from participants to design a patient-centred asthma self-management system. This study is the first  
372 step in developing the Asthma Attack Management Online System (AAMOS) which will support  
373 asthma patients with real-time tailored feedback based on machine learning driven by mHealth data.

374

## 375 ACKNOWLEDGEMENTS

376 We thank the AUKCAR PPI for their comments on the study. We thank Malmö University for their  
377 support with data collection. We thank Smart Respiratory Products Ltd for providing the Smart Peak  
378 Flow Meter and associated software. We thank FindAir for providing the FindAir ONE devices and  
379 FindAir's API. We thank Ambee for providing the pollen data. We thank Dr Sarah Brown (Edinburgh  
380 Innovations, University of Edinburgh, UK) for organising the contracts required for the study.

381

## 382 AUTHOR CONTRIBUTIONS

383 KCHT, HP, AMW, and SAS designed the study. SAS is the study guarantor. KCHT and DS set up the  
384 data collection system. KCHT drafted the manuscript which was critically revised by HP, AMW, DS,  
385 and SAS. All authors approved the final version of the manuscript.

386

## 387 FUNDING

388 This work was supported by Asthma + Lung UK as part of the Asthma UK Centre for Applied Research  
389 grant number AUK-AC-2018-01. Support from Malmö University is co-funded by the Knowledge  
390 Foundation KK-stiftelsen.

391



## COMPETING INTEREST STATEMENT

None declared.

## REFERENCES

- 1 Asthma UK. Asthma facts and statistics. <https://www.asthma.org.uk/about/media/facts-and-statistics/> (accessed 1 Mar 2021).
- 2 Iacobucci G. Asthma deaths rise 33% in past decade in England and Wales. *BMJ* 2019;**366**:l5108. doi:10.1136/BMJ.L5108
- 3 Pinnock H, Parke HL, Panagioti M, *et al*. Systematic meta-review of supported self-management for asthma: A healthcare perspective. *BMC Med* 2017;**15**:64. doi:10.1186/s12916-017-0823-7
- 4 Scottish Intercollegiate Guidelines Network/ British Thoracic Society. *SIGN 158 British guideline on the management of asthma*. London/Edinburgh: : BTS/SIGN 2019.
- 5 Juniper EF, O'Byrne PM, Guyatt GH, *et al*. Development and validation of a questionnaire to measure asthma control. *Eur Respir J* 1999;**14**:902–7. doi:10.1034/j.1399-3003.1999.14d29.x
- 6 Tsang KCH, Pinnock H, Wilson AM, *et al*. Application of Machine Learning to Support Self-Management of Asthma with mHealth. In: *2020 42nd Annual International Conference of the IEEE Engineering in Medicine & Biology Society (EMBC)*. IEEE 2020. 5673–7. doi:10.1109/EMBC44109.2020.9175679
- 7 Su JG, Barrett MA, Henderson K, *et al*. Feasibility of Deploying Inhaler Sensors to Identify the Impacts of Environmental Triggers and Built Environment Factors on Asthma Short-Acting Bronchodilator Use. *Environ Health Perspect* 2017;**125**:254–61. doi:10.1289/EHP266
- 8 Tinschert P, Jakob R, Barata F, *et al*. The Potential of Mobile Apps for Improving Asthma Self-Management: A Review of Publicly Available and Well-Adopted Asthma Apps. *JMIR mHealth uHealth* 2017;**5**:e113. doi:10.2196/mhealth.7177
- 9 MyAsthma. myAsthma: The asthma app for managing your symptoms. <https://mymhealth.com/myasthma> (accessed 10 Mar 2021).
- 10 AsthmaMD. Asthma Control iPhone App | AsthmaMD. <https://www.asthamamd.org/> (accessed 10 Mar 2021).
- 11 Tsang KCH, Pinnock H, Wilson AM, *et al*. Application of machine learning algorithms for asthma management with mHealth: a clinical review. *J Asthma Allergy* 2022;**15**:855–73. doi:10.2147/JAA.S285742
- 12 Finkelstein J, Jeong I cheol. Machine Learning Approaches to Personalize Early Prediction of Asthma Exacerbations. *Ann N Y Acad Sci* 2017;**1387**:153–65. doi:10.1111/nyas.13218
- 13 Castner J, Jungquist CR, Mammen MJ, *et al*. Prediction Model Development of Women's Daily Asthma Control Using Fitness Tracker Sleep Disruption. *Hear Lung* 2020;**49**:548–55. doi:10.1016/j.hrtlng.2020.01.013
- 14 Huffaker MF, Carchia M, Harris BU, *et al*. Passive Nocturnal Physiologic Monitoring Enables Early Detection of Exacerbations in Children with Asthma. A Proof-of-Concept Study. *Am J Respir Crit Care Med* 2018;**198**:320–8. doi:10.1164/rccm.201712-2606OC

1  
2  
3  
4  
5  
6  
7  
8  
9  
10  
11  
12  
13  
14  
15  
16  
17  
18  
19  
20  
21  
22  
23  
24  
25  
26  
27  
28  
29  
30  
31  
32  
33  
34  
35  
36  
37  
38  
39  
40  
41  
42  
43  
44  
45  
46  
47  
48  
49  
50  
51  
52  
53  
54  
55  
56  
57  
58  
59  
60

- 432 15 Tibble H, Chan A, Mitchell EA, *et al.* A Data-Driven Typology of Asthma Medication Adherence  
433 Using Cluster Analysis. *Sci Rep* 2020;**10**:14999. doi:10.1038/s41598-020-72060-0
- 434 16 Tinschert P, Rassouli F, Barata F, *et al.* Nocturnal Cough and Sleep Quality to Assess Asthma  
435 Control and Predict Attacks. *J Asthma Allergy* 2020;**13**:669–78. doi:10.2147/JAA.S278155
- 436 17 Zhang O, Minku LL, Gonem S. Detecting Asthma Exacerbations Using Daily Home Monitoring  
437 and Machine Learning. *J Asthma* 2021;**58**:1518–27. doi:10.1080/02770903.2020.1802746
- 438 18 Khasha R, Sepehri MM, Mahdaviani SA. An Ensemble Learning Method for Asthma Control  
439 Level Detection with Leveraging Medical Knowledge-Based Classifier and Supervised Learning.  
440 *J Med Syst* 2019;**43**:158. doi:10.1007/s10916-019-1259-8
- 441 19 Alharbi E, Abdullah M. Asthma Attack Prediction Based on Weather Factors. *Period Eng Nat  
442 Sci* 2019;**7**:408–19. doi:10.21533/PEN.V7I1.422
- 443 20 Exarchos KP, Beltsiou M, Votti CA, *et al.* Artificial intelligence techniques in asthma: a  
444 systematic review and critical appraisal of the existing literature. *Eur Respir J* 2020;**56**.  
445 doi:10.1183/13993003.00521-2020
- 446 21 Chan Y-FY, Wang P, Rogers L, *et al.* The Asthma Mobile Health Study, a large-scale clinical  
447 observational study using ResearchKit. *Nat Biotechnol* 2017;**35**:354–62. doi:10.1038/nbt.3826
- 448 22 Honkoop PJ, Simpson A, Bonini M, *et al.* MyAirCoach: The Use of Home-Monitoring and  
449 mHealth Systems to Predict Deterioration in Asthma Control and the Occurrence of Asthma  
450 Exacerbations; Study Protocol of an Observational Study. *BMJ Open* 2017;**7**:e013935.  
451 doi:10.1136/bmjopen-2016-013935
- 452 23 Khusial RJ, Honkoop PJ, Usmani O, *et al.* Effectiveness of myAirCoach: A mHealth Self-  
453 Management System in Asthma. *J Allergy Clin Immunol Pract* 2020;**8**:1972-1979.e8.  
454 doi:10.1016/J.JAIP.2020.02.018
- 455 24 myAirCoach. D7.6 Data Management Plan (Second Year Update).  
456 2016.<https://www.myaircoach.eu/content/d76-data-management-plan-second-year-update>  
457 (accessed 20 Aug 2022).
- 458 25 Blakey JD, Price DB, Pizzichini E, *et al.* Identifying Risk of Future Asthma Attacks Using UK  
459 Medical Record Data: A Respiratory Effectiveness Group Initiative. *J Allergy Clin Immunol  
460 Pract* 2017;**5**:1015-1024.e8. doi:10.1016/j.jaip.2016.11.007
- 461 26 Price D, Wilson AM, Chisholm A, *et al.* Predicting Frequent Asthma Exacerbations Using Blood  
462 Eosinophil Count and Other Patient Data Routinely Available in Clinical Practice. *J Asthma  
463 Allergy* 2016;**9**:1–12. doi:10.2147/JAA.S97973
- 464 27 FindAir. FindAir. <https://findair.eu/> (accessed 9 Mar 2022).
- 465 28 Hui CY, McKinstry B, Walton R, *et al.* A Mixed Method Observational Study of Strategies to  
466 Promote Adoption and Usage of an Application to Support Asthma Self-Management. *J Innov  
467 Heal Informatics* 2019;**25**:243–53. doi:10.14236/jhi.v25i4.1056
- 468 29 Pathiravasan CH, Zhang Y, Trinquart L, *et al.* Adherence of Mobile App-Based Surveys and  
469 Comparison With Traditional Surveys: eCohort Study. *J Med Internet Res* 2021;**23**:e24773.  
470 doi:10.2196/24773
- 471 30 Xu X, Tupy S, Robertson S, *et al.* Successful adherence and retention to daily monitoring of  
472 physical activity: Lessons learned. *PLoS One* 2018;**13**:e0199838.  
473 doi:10.1371/journal.pone.0199838

- 1  
2  
3 474 31 Senturia YD, McNiff Mortimer K, Baker D, *et al.* Successful Techniques for Retention of Study  
4 475 Participants in an Inner-City Population. *Control Clin Trials* 1998;**19**:544–54.  
5 476 doi:10.1016/S0197-2456(98)00032-4  
6  
7 477 32 Compernelle S, Vandelanotte C, Cardon G, *et al.* Effectiveness of a Web-Based, Computer-  
8 478 Tailored, Pedometer-Based Physical Activity Intervention for Adults: A Cluster Randomized  
9 479 Controlled Trial. *J Med Internet Res* 2015;**17**:e38. doi:10.2196/jmir.3402  
10  
11 480 33 Liu FT, Ting KM, Zhou Z-H. Isolation Forest. In: *2008 Eighth IEEE International Conference on*  
12 481 *Data Mining*. IEEE 2008. 413–22. doi:10.1109/ICDM.2008.17  
13  
14 482 34 Reddel HK, Taylor DR, Bateman ED, *et al.* An official American Thoracic Society/European  
15 483 Respiratory Society statement: Asthma control and exacerbations - Standardizing endpoints  
16 484 for clinical asthma trials and clinical practice. *Am J Respir Crit Care Med* 2009;**180**:59–99.  
17 485 doi:10.1164/rccm.200801-060ST  
18  
19 486 35 Salvi D, Magnus Olsson C, Ymeri G, *et al.* Mobistudy: mobile-based, platform-independent,  
20 487 multi-dimensional data collection for clinical studies. In: *11th International Conference on the*  
21 488 *Internet of Things*. St.Gallen, Switzerland: : ACM 2021. 219–22. doi:10.1145/3494322  
22  
23 489 36 Smart Asthma. Smart Asthma. <https://smartasthma.com/> (accessed 9 Mar 2022).  
24  
25 490 37 Xiaomi. Xiaomi UK. <https://www.mi.com/uk/> (accessed 9 Mar 2022).  
26  
27 491 38 OpenWeatherMaps. OpenWeatherMap. <https://openweathermap.org/> (accessed 14 Jun  
28 492 2021).  
29  
30 493 39 Ambee. Ambee. <https://www.getambee.com/> (accessed 14 Jun 2021).  
31  
32 494 40 Brooke J. SUS: A 'Quick and Dirty' Usability Scale. In: *Usability Evaluation In Industry*. CRC  
33 495 Press 1996. 207–12. doi:10.1201/9781498710411-35  
34  
35 496 41 Stoyanov SR, Hides L, Kavanagh DJ, *et al.* Development and Validation of the User Version of  
36 497 the Mobile Application Rating Scale (uMARS). *JMIR mHealth uHealth* 2016;**4**:e72.  
37 498 doi:10.2196/mhealth.5849  
38  
39 499 42 Dewar AR, Bull TP, Malvey DM, *et al.* Developing a Measure of Engagement with Telehealth  
40 500 Systems: The mHealth Technology Engagement Index. *J Telemed Telecare* 2017;**23**:248–55.  
41 501 doi:10.1177/1357633X16640958  
42  
43 502 43 Chan Y-FY, Bot BM, Zweig M, *et al.* The asthma mobile health study, smartphone data  
44 503 collected using ResearchKit. *Sci Data* 2018;**5**:180096. doi:10.1038/sdata.2018.96  
45  
46 504 44 Hastie T, Tibshirani R, Friedman J. *The Elements of Statistical Learning*. 2nd ed. New York, NY: :  
47 505 Springer 2009. doi:10.1007/978-0-387-84858-7  
48  
49 506 45 Bishop CM. *Pattern Recognition and Machine Learning*. Berlin, Heidelberg: : Springer 2006.  
50  
51 507 46 Lavorini F, Corrigan CJ, Barnes PJ, *et al.* Retail Sales of Inhalation Devices in European  
52 508 Countries: So Much for a Global Policy. *Respir Med* 2011;**105**:1099–103.  
53 509 doi:10.1016/j.rmed.2011.03.012  
54  
55 510 47 The University of Edinburgh. Edinburgh DataShare. <https://datashare.ed.ac.uk/> (accessed 15  
56 511 Aug 2022).  
57  
58 512  
59  
60

## FIGURE LEGENDS

- 1  
2  
3  
4 513  
5 514 *Figure 1. AAMOS-00 system overview*  
6  
7 515 *Figure 2. Mobistudy system overview*  
8  
9 516 *Figure 3. Participant's app home page*  
10  
11 517 *Figure 4. Questionnaire delivered by Mobistudy*  
12  
13 518 *Figure 5. Smart peak flow meter task*  
14  
15 519 *Figure 6. Smartwatch data*  
16 520 *Figure 7. Local weather data*  
17  
18 521 *Figure 8. Exploring asthma attack prediction.*  
19  
20  
21  
22  
23  
24  
25  
26  
27  
28  
29  
30  
31  
32  
33  
34  
35  
36  
37  
38  
39  
40  
41  
42  
43  
44  
45  
46  
47  
48  
49  
50  
51  
52  
53  
54  
55  
56  
57  
58  
59  
60

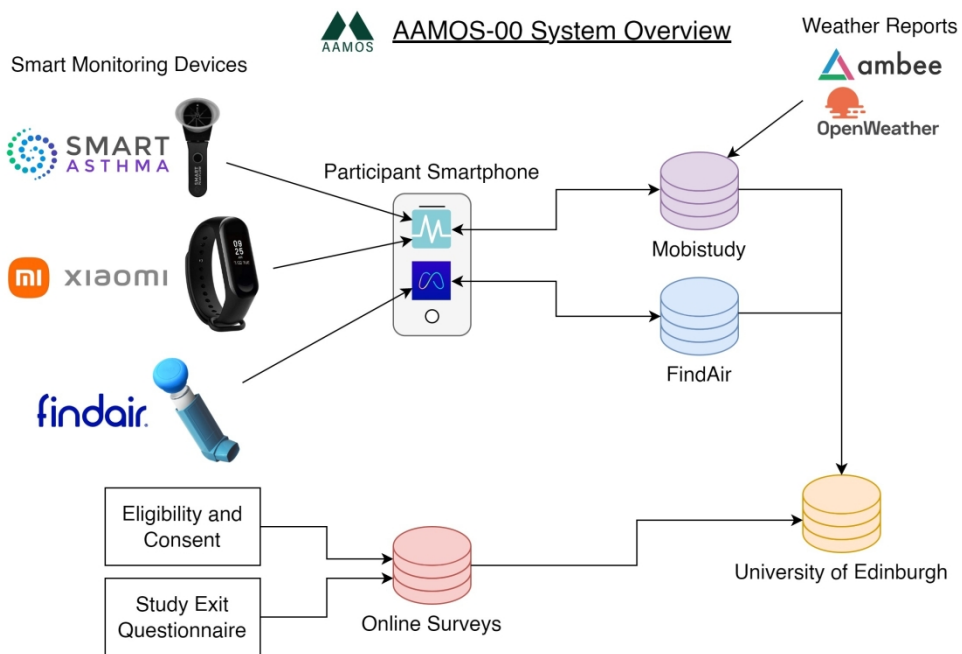

Figure 1: AAMOS-00 system overview

819x545mm (72 x 72 DPI)

1  
2  
3  
4  
5  
6  
7  
8  
9  
10  
11  
12  
13  
14  
15  
16  
17  
18  
19  
20  
21  
22  
23  
24  
25  
26  
27  
28  
29  
30  
31  
32  
33  
34  
35  
36  
37  
38  
39  
40  
41  
42  
43  
44  
45  
46  
47  
48  
49  
50  
51  
52  
53  
54  
55  
56  
57  
58  
59  
60

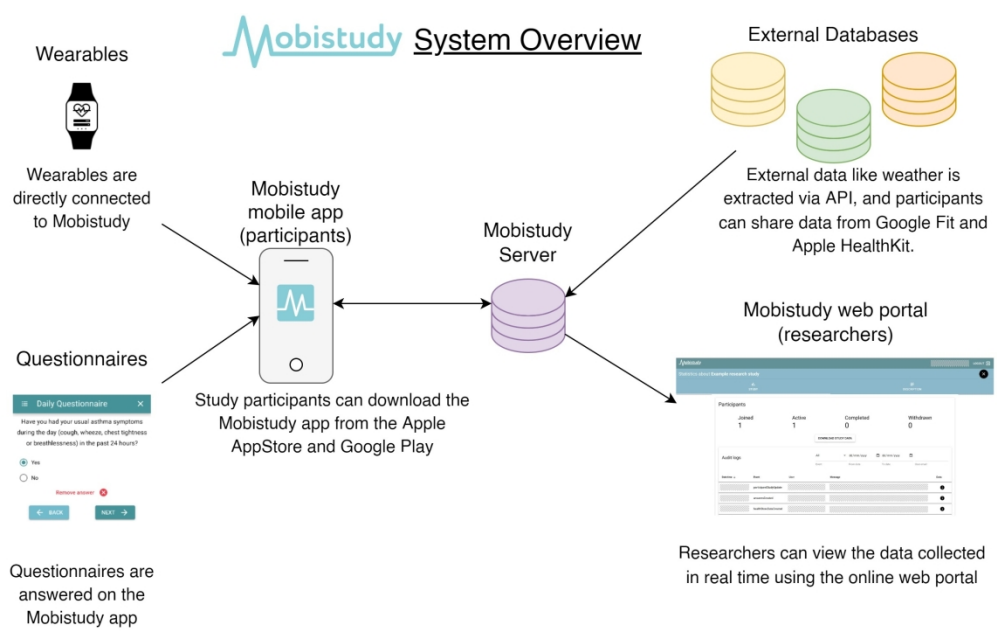

Figure 2: Mobistudy system overview

864x535mm (72 x 72 DPI)

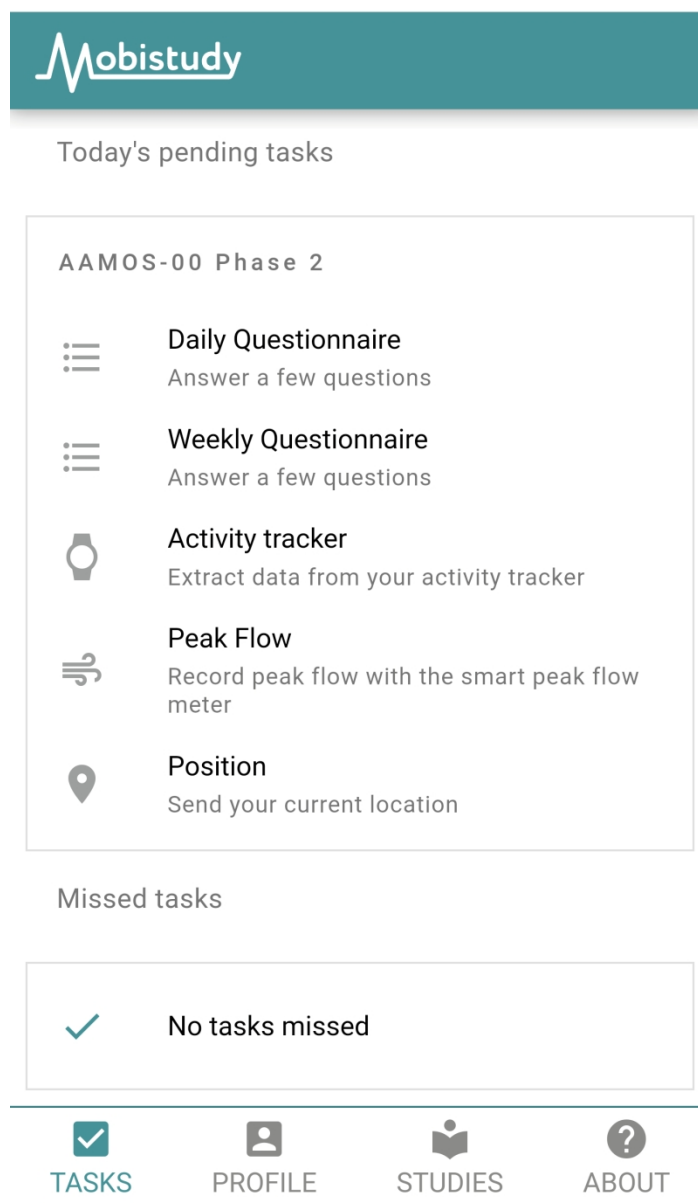

Figure 3: Participant's app home page

121x208mm (300 x 300 DPI)

1  
2  
3  
4  
5  
6  
7  
8  
9  
10  
11  
12  
13  
14  
15  
16  
17  
18  
19  
20  
21  
22  
23  
24  
25  
26  
27  
28  
29  
30  
31  
32  
33  
34  
35  
36  
37  
38  
39  
40  
41  
42  
43  
44

☰ Daily Questionnaire ✕

Have you had your usual asthma symptoms during the day (cough, wheeze, chest tightness or breathlessness) in the past 24 hours?

Yes

No

Remove answer ✕

← BACK      NEXT →

45  
46  
47  
48  
49  
50  
51  
52  
53  
54  
55  
56  
57  
58  
59  
60

Figure 4: Questionnaire delivered by Mobistudy

121x208mm (300 x 300 DPI)



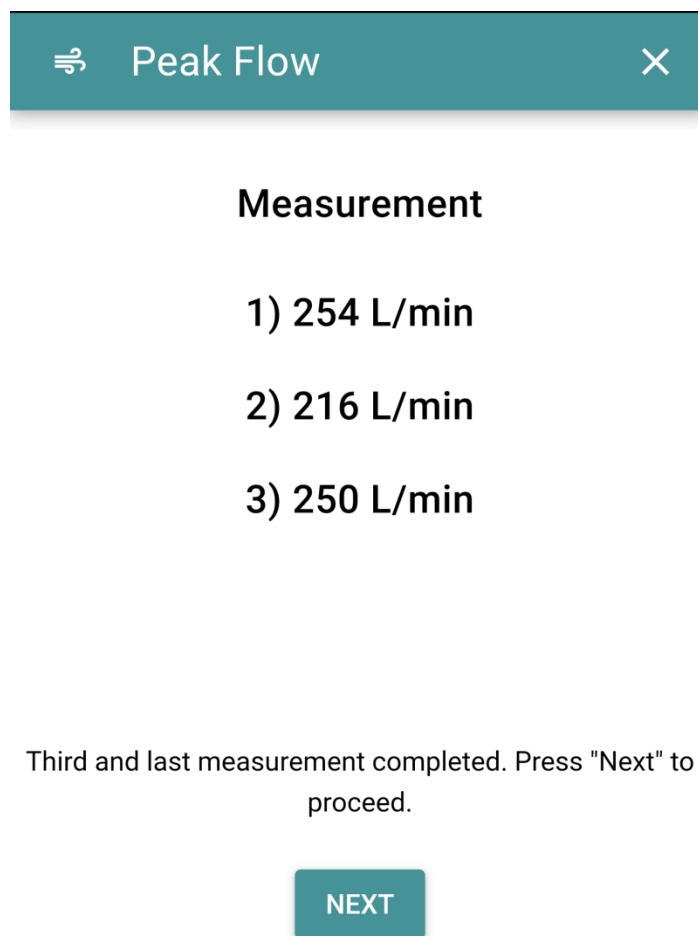

Figure 5: Smart peak flow meter task

121x208mm (300 x 300 DPI)

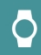

## Activity tracker

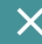

The following charts summarize the data that have been retrieved from the band. Tap on "Send" to share these data with the research team or tap on "Discard" to avoid sending these data.

### Activity over time

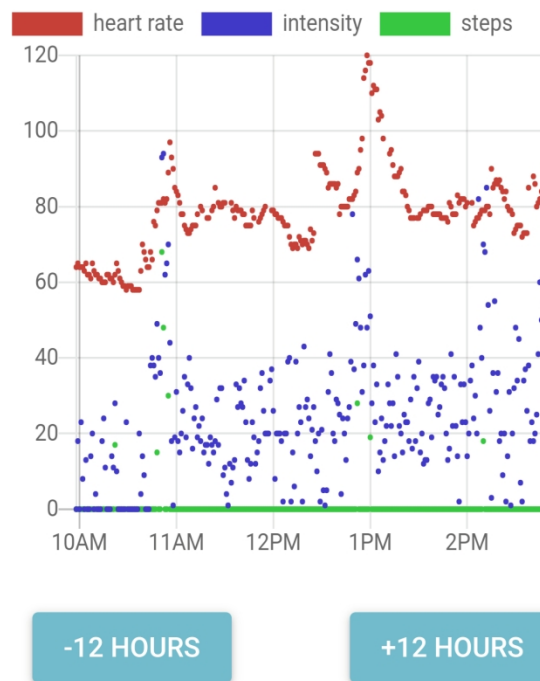

### Time spent in each activity

Figure 6: Smartwatch data

121x207mm (300 x 300 DPI)

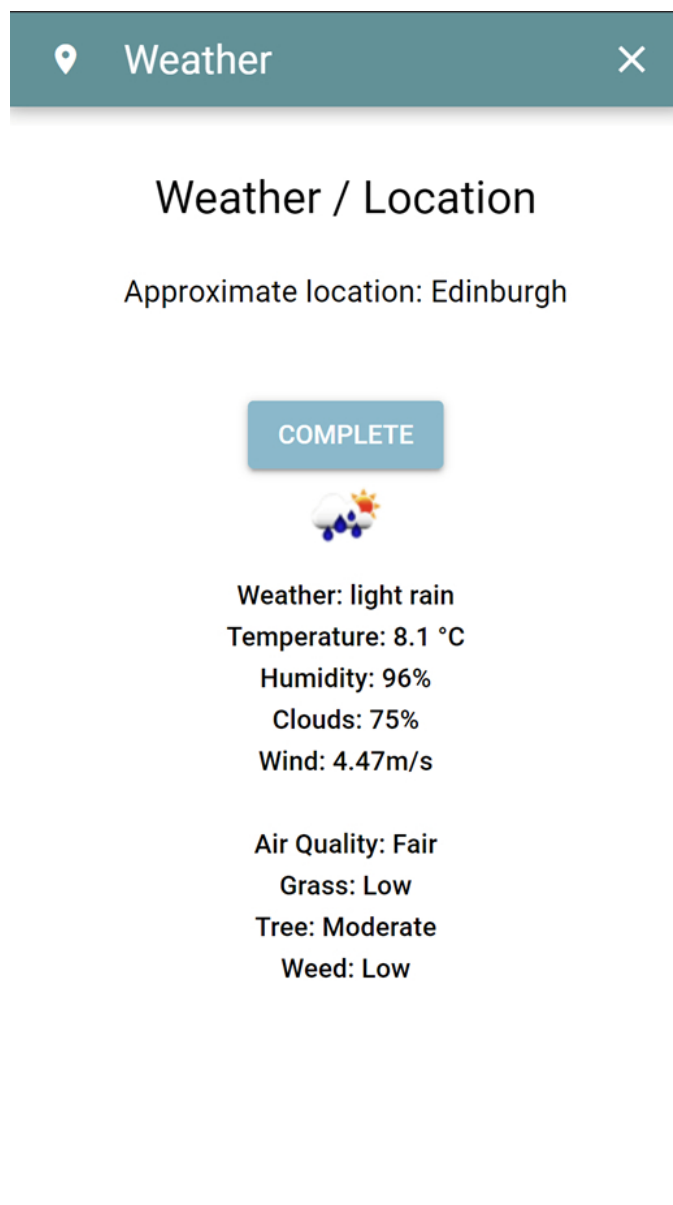

45 Figure 7: Local weather data

46 44x78mm (300 x 300 DPI)

1  
2  
3  
4  
5  
6  
7  
8  
9  
10  
11  
12  
13  
14  
15  
16  
17  
18  
19  
20  
21  
22  
23  
24  
25  
26  
27  
28  
29  
30  
31  
32  
33  
34  
35  
36  
37  
38  
39  
40  
41  
42  
43  
44  
45  
46  
47  
48  
49  
50  
51  
52  
53  
54  
55  
56  
57  
58  
59  
60

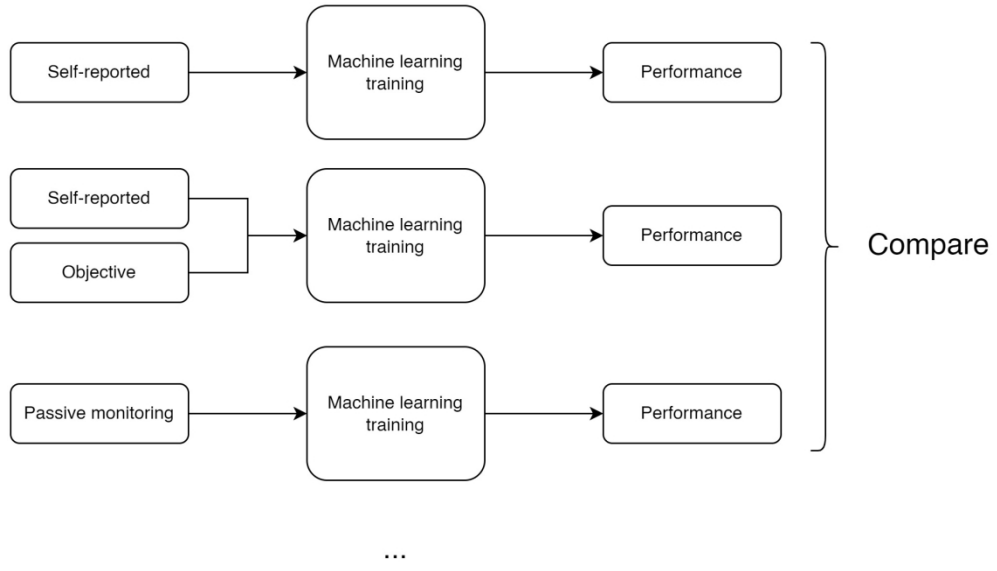

Figure 8. Exploring asthma attack prediction

714x407mm (72 x 72 DPI)

## STROBE Statement—checklist of items that should be included in reports of observational studies

|                              | Item No | Recommendation                                                                                                                                                                                                                                                                                                                                                                                                                                                         | Page No |
|------------------------------|---------|------------------------------------------------------------------------------------------------------------------------------------------------------------------------------------------------------------------------------------------------------------------------------------------------------------------------------------------------------------------------------------------------------------------------------------------------------------------------|---------|
| <b>Title and abstract</b>    | 1       | (a) Indicate the study's design with a commonly used term in the title or the abstract                                                                                                                                                                                                                                                                                                                                                                                 | 1       |
|                              |         | (b) Provide in the abstract an informative and balanced summary of what was done and what was found                                                                                                                                                                                                                                                                                                                                                                    | 2       |
| <b>Introduction</b>          |         |                                                                                                                                                                                                                                                                                                                                                                                                                                                                        |         |
| Background/rationale         | 2       | Explain the scientific background and rationale for the investigation being reported                                                                                                                                                                                                                                                                                                                                                                                   | 4       |
| Objectives                   | 3       | State specific objectives, including any prespecified hypotheses                                                                                                                                                                                                                                                                                                                                                                                                       | 4       |
| <b>Methods</b>               |         |                                                                                                                                                                                                                                                                                                                                                                                                                                                                        |         |
| Study design                 | 4       | Present key elements of study design early in the paper                                                                                                                                                                                                                                                                                                                                                                                                                | 7       |
| Setting                      | 5       | Describe the setting, locations, and relevant dates, including periods of recruitment, exposure, follow-up, and data collection                                                                                                                                                                                                                                                                                                                                        | 5       |
| Participants                 | 6       | (a) <i>Cohort study</i> —Give the eligibility criteria, and the sources and methods of selection of participants. Describe methods of follow-up<br><i>Case-control study</i> —Give the eligibility criteria, and the sources and methods of case ascertainment and control selection. Give the rationale for the choice of cases and controls<br><i>Cross-sectional study</i> —Give the eligibility criteria, and the sources and methods of selection of participants | 5       |
|                              |         | (b) <i>Cohort study</i> —For matched studies, give matching criteria and number of exposed and unexposed<br><i>Case-control study</i> —For matched studies, give matching criteria and the number of controls per case                                                                                                                                                                                                                                                 |         |
| Variables                    | 7       | Clearly define all outcomes, exposures, predictors, potential confounders, and effect modifiers. Give diagnostic criteria, if applicable                                                                                                                                                                                                                                                                                                                               | 6       |
| Data sources/<br>measurement | 8*      | For each variable of interest, give sources of data and details of methods of assessment (measurement). Describe comparability of assessment methods if there is more than one group                                                                                                                                                                                                                                                                                   | 7       |
| Bias                         | 9       | Describe any efforts to address potential sources of bias                                                                                                                                                                                                                                                                                                                                                                                                              | NA      |
| Study size                   | 10      | Explain how the study size was arrived at                                                                                                                                                                                                                                                                                                                                                                                                                              | 6       |
| Quantitative variables       | 11      | Explain how quantitative variables were handled in the analyses. If applicable, describe which groupings were chosen and why                                                                                                                                                                                                                                                                                                                                           | 8       |
| Statistical methods          | 12      | (a) Describe all statistical methods, including those used to control for confounding                                                                                                                                                                                                                                                                                                                                                                                  | 10      |
|                              |         | (b) Describe any methods used to examine subgroups and interactions                                                                                                                                                                                                                                                                                                                                                                                                    | 10      |
|                              |         | (c) Explain how missing data were addressed                                                                                                                                                                                                                                                                                                                                                                                                                            | 10      |
|                              | NA      | (d) <i>Cohort study</i> —If applicable, explain how loss to follow-up was addressed<br><i>Case-control study</i> —If applicable, explain how matching of cases and controls was addressed<br><i>Cross-sectional study</i> —If applicable, describe analytical methods taking account of sampling strategy                                                                                                                                                              |         |
|                              |         | (e) Describe any sensitivity analyses                                                                                                                                                                                                                                                                                                                                                                                                                                  | 10      |

Continued on next page

1  
2  
3  
4  
5  
6  
7  
8  
9  
10  
11  
12  
13  
14  
15  
16  
17  
18  
19  
20  
21  
22  
23  
24  
25  
26  
27  
28  
29  
30  
31  
32  
33  
34  
35  
36  
37  
38  
39  
40  
41  
42  
43  
44  
45  
46  
47  
48  
49  
50  
51  
52  
53  
54  
55  
56  
57  
58  
59  
60**Results**

|                  |     |                                                                                                                                                                                                              |    |
|------------------|-----|--------------------------------------------------------------------------------------------------------------------------------------------------------------------------------------------------------------|----|
| Participants     | 13* | (a) Report numbers of individuals at each stage of study—eg numbers potentially eligible, examined for eligibility, confirmed eligible, included in the study, completing follow-up, and analysed            | NA |
|                  |     | (b) Give reasons for non-participation at each stage                                                                                                                                                         | NA |
|                  |     | (c) Consider use of a flow diagram                                                                                                                                                                           | NA |
| Descriptive data | 14* | (a) Give characteristics of study participants (eg demographic, clinical, social) and information on exposures and potential confounders                                                                     | NA |
|                  |     | (b) Indicate number of participants with missing data for each variable of interest                                                                                                                          | NA |
|                  |     | (c) <i>Cohort study</i> —Summarise follow-up time (eg, average and total amount)                                                                                                                             | NA |
| Outcome data     | 15* | <i>Cohort study</i> —Report numbers of outcome events or summary measures over time                                                                                                                          | NA |
|                  |     | <i>Case-control study</i> —Report numbers in each exposure category, or summary measures of exposure                                                                                                         | NA |
|                  |     | <i>Cross-sectional study</i> —Report numbers of outcome events or summary measures                                                                                                                           | NA |
| Main results     | 16  | (a) Give unadjusted estimates and, if applicable, confounder-adjusted estimates and their precision (eg, 95% confidence interval). Make clear which confounders were adjusted for and why they were included | NA |
|                  |     | (b) Report category boundaries when continuous variables were categorized                                                                                                                                    | NA |
|                  |     | (c) If relevant, consider translating estimates of relative risk into absolute risk for a meaningful time period                                                                                             | NA |
| Other analyses   | 17  | Report other analyses done—eg analyses of subgroups and interactions, and sensitivity analyses                                                                                                               | NA |

**Discussion**

|                  |    |                                                                                                                                                                            |    |
|------------------|----|----------------------------------------------------------------------------------------------------------------------------------------------------------------------------|----|
| Key results      | 18 | Summarise key results with reference to study objectives                                                                                                                   | NA |
| Limitations      | 19 | Discuss limitations of the study, taking into account sources of potential bias or imprecision. Discuss both direction and magnitude of any potential bias                 | NA |
| Interpretation   | 20 | Give a cautious overall interpretation of results considering objectives, limitations, multiplicity of analyses, results from similar studies, and other relevant evidence | NA |
| Generalisability | 21 | Discuss the generalisability (external validity) of the study results                                                                                                      | 10 |

**Other information**

|         |    |                                                                                                                                                               |    |
|---------|----|---------------------------------------------------------------------------------------------------------------------------------------------------------------|----|
| Funding | 22 | Give the source of funding and the role of the funders for the present study and, if applicable, for the original study on which the present article is based | 12 |
|---------|----|---------------------------------------------------------------------------------------------------------------------------------------------------------------|----|

\*Give information separately for cases and controls in case-control studies and, if applicable, for exposed and unexposed groups in cohort and cross-sectional studies.

**Note:** An Explanation and Elaboration article discusses each checklist item and gives methodological background and published examples of transparent reporting. The STROBE checklist is best used in conjunction with this article (freely available on the Web sites of PLoS Medicine at <http://www.plosmedicine.org/>, Annals of Internal Medicine at <http://www.annals.org/>, and Epidemiology at <http://www.epidem.com/>). Information on the STROBE Initiative is available at [www.strobe-statement.org](http://www.strobe-statement.org).
